# Supplementary material for: An efficient synthesis of 4-phenoxy-quinazoline, 2-phenoxy-quinoxaline, and 2-phenoxy-pyridine derivatives using aryne chemistry
Source: Royal Society of Chemistry journal article supplement (doi:10.1039/d0ra09994e), 2021-01-01
Supplement: d0ra09994e1.pdf [file d0ra09994e1.pdf]

## **An efficient synthesis of 4-phenoxy-quinazoline, 2-phenoxy-quinoxaline, 2-phenoxy-pyridine derivatives by aryne chemistry,**

Mahesh K. Zilla,<sup>a,b#</sup> Sheena Mahajan,<sup>b,c#</sup> Rajni Khajuria,<sup>d</sup> Vivek K. Gupta,<sup>e</sup> Kamal K. Kapoor<sup>c</sup>,  
and Asif Ali,<sup>b,f,\*</sup>

---

<sup>a</sup>*Department of Chemistry, Indian Institute of Science education and Research, Berhampur, Odisha 760010, India. E-mail: [mzilla@iiserbpr.ac.in](mailto:mzilla@iiserbpr.ac.in)*

<sup>b</sup>*CSIR-Indian Institute of Integrative Medicine, Canal Road, Jammu-180001, India.*

<sup>c</sup>*Department of Chemistry, University of Jammu, Jammu Tawi- 180006, India.*

*E-mail: [sheena01mahajan@gmail.com](mailto:sheena01mahajan@gmail.com), [kamalkka@gmail.com](mailto:kamalkka@gmail.com).*

<sup>d</sup>*Department of Chemistry, GCW Kathua, Jammu Tawi- 18000, India. E-mail: [khajuriarajni36@gmail.com](mailto:khajuriarajni36@gmail.com).*

<sup>e</sup>*Post-Graduate Department of Physics & Electronics, University of Jammu, Jammu Tawi- 180006, India. E-mail: [vivek.gupta2k9@gmail.com](mailto:vivek.gupta2k9@gmail.com)*

<sup>f</sup>*CSIR-Traditional Knowledge Digital Library (TKDL), 14-Satsang Vihar, Vigyan Suchna Bhawan, New Delhi-110067, India. E-mail : [asifali@csir.res.in](mailto:asifali@csir.res.in)*

**General procedure for the preparation of 4-Phenoxy-2-arylquinazoline(3a-e) with aryne**

4-Phenoxy-2-phenylquinazoline (3a)

4-Phenoxy-2-(3,4,5-trimethoxyphenyl)quinazoline (3b)

2-(4-(Methylthio)phenyl)-4-phenoxyquinazoline (3c)

4-Phenoxy-2-(4-(trifluoromethoxy)phenyl)quinazoline (3d)

4-Phenoxy-2-(4-(trifluoromethyl)phenyl)quinazoline (3e)

**General procedure for the preparation of (*E*)-2-Phenoxy-3-styrylquinoxaline (5a-e) with aryne**

(*E*)-2-(4-Methoxystyryl)-3-phenoxyquinoxaline (5a)

(*E*)-3-(4-Methoxystyryl)-1-phenylquinoxalin-2(1*H*)-one (6a)

(*E*)-2-Phenoxy-3-(3,4,5-trimethoxystyryl)quinoxaline (5b)

(*E*)-1-Phenyl-3-(3,4,5-trimethoxystyryl)quinoxalin-2(1*H*)-one (6b)

2-((*E*)-2-(Benzo[*d*][1,3]dioxol-5-yl)vinyl)-3-phenoxyquinoxaline (5c)

(*E*)-3-(2-(Benzo[*d*][1,3]dioxol-5-yl)vinyl)-1-phenylquinoxalin-2(1*H*)-one (6c)

(*E*)-2-Phenoxy-3-(4-(trifluoromethyl)styryl)quinoxaline (5d)

(*E*)-1-Phenyl-3-(4-(trifluoromethyl)styryl)quinoxalin-2(1*H*)-one (6d)

(*E*)-2-(2-Chlorostyryl)-3-phenoxyquinoxaline (5e)

(*E*)-3-(2-Chlorostyryl)-1-phenylquinoxalin-2(1*H*)-one (6e)

**General procedure for the preparation of 2-phenoxy pyridine derivatives (8a-f) with aryne**

2-Phenoxy-6-phenyl-4-(3,4,5-trimethoxyphenyl)pyridine (8a)

2-(4-Methoxyphenyl)-6-phenoxy-4-(3,4,5-trimethoxyphenyl)pyridine (8b)

4-(3-Nitrophenyl)-2-phenoxy-6-phenylpyridine (8c)

4-(4-Bromophenyl)-2-(4-chlorophenyl)-6-phenoxy-4-phenylpyridine (8d)

6-Phenoxy-4-phenyl-2, 2'-bipyridine (8e)

4-(Furan-2-yl)-2-phenoxy-6-phenylpyridine (8f)

**General procedure for the preparation of 4-Phenoxy-2-arylquinazoline(3a-e) with aryne:**

To a stirred solution of 2-phenylquinazolin-4(3H)-one (**1a-e**) (0.45mmol, 1.0 equiv) and trimethylsilyl phenyl triflate (**2**) (0.54mmol, 1.2 equiv) in acetonitrile as solvent, was added cesium fluoride (1.35mmol, 3.0 equiv) at room temperature. The mixture was stirred at room temperature for 4hr, after completing the reaction, reaction mixture was concentrated in vacuo. To the resulting residue, water was added, and the mixture was extracted with ethyl acetate three times. The combined organic phase was dried over sodium sulphate, and concentrated in vacuo. The crude product was purified by column chromatography (EtOAc in Hexane) resulting the product.

**4-Phenoxy-2-phenylquinazoline (3a).**<sup>1</sup>H NMR (400 MHz, CDCl<sub>3</sub>): δ 8.25

(d, *J* = 7.7 Hz, 3H), 7.94 (d, *J* = 8.4 Hz, 1H), 7.75 (dd, *J* = 11.3, 4.0 Hz, 1H), 7.47 (t, *J* = 7.6 Hz, 1H), 7.39 (t, *J* = 7.8 Hz, 2H), 7.26 (ddd, *J* = 19.9, 10.0, 4.5 Hz, 6H); <sup>13</sup>C NMR (101 MHz, CDCl<sub>3</sub>) δ 167.51, 160.71, 153.53, 153.49, 138.51, 134.77, 131.38, 130.25, 129.28, 129.19, 128.97, 127.64, 126.35, 124.39, 122.85, 115.94; IR: 3387, 3064, 2850, 1622, 1573, 1484, 1347, 1210, 933, 770 cm<sup>-1</sup>; HRMS-ESI [M+H]<sup>+</sup>*m/z* calcd for C<sub>20</sub>H<sub>15</sub>N<sub>2</sub>O: 299.1179, found 299.1176.

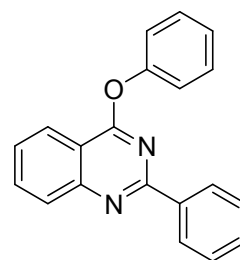**4-Phenoxy-2-(3,4,5-trimethoxyphenyl)quinazoline (3b).**<sup>1</sup>H NMR

(400 MHz, CDCl<sub>3</sub>): δ 8.25 (d, *J* = 7.9 Hz, 1H), 7.95 (d, *J* = 8.4 Hz, 1H), 7.79 (dd, *J* = 11.2, 4.1 Hz, 1H), 7.55 (s, 2H), 7.49 (t, *J* = 7.5 Hz, 1H), 7.39 (t, *J* = 7.8 Hz, 2H), 7.28 (d, *J* = 7.7 Hz, 2H), 7.22 (t, *J* = 7.3 Hz, 1H), 3.79 (s, 3H), 3.76 (s, 6H); <sup>13</sup>C NMR (101 MHz, CDCl<sub>3</sub>): δ 166.61, 159.11, 153.07, 152.84, 152.74, 140.40, 133.97, 132.90, 129.21, 128.05, 126.74, 125.50, 123.53, 122.40, 114.81, 105.49, 60.88, 55.91; IR: 3352, 2581, 1622, 1575, 1398, 1268, 1165, 1126, 767 cm<sup>-1</sup>; HRMS-ESI [M+H]<sup>+</sup>*m/z* calcd for C<sub>23</sub>H<sub>21</sub>N<sub>2</sub>O<sub>4</sub>: 389.1496, found 389.1506.

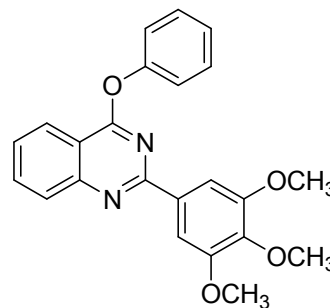**2-(4-(Methylthio)phenyl)-4-phenoxyquinazoline (3c).**<sup>1</sup>H NMR

(400 MHz, CDCl<sub>3</sub>): δ 8.41 (d, *J* = 8.4 Hz, 2H), 8.03 (d, *J* = 8.1 Hz, 1H), 7.86 (d, *J* = 8.4 Hz, 1H), 7.70 (t, *J* = 7.4 Hz, 1H), 7.43 – 7.29 (m, 5H), 7.28 – 7.17 (m, 3H), 4.15 (s, 3H); <sup>13</sup>C NMR (101 MHz, CDCl<sub>3</sub>): δ 167.05, 159.44, 151.81, 139.46, 136.62, 134.81, 133.50, 132.00, 129.84, 129.34, 129.16, 127.92, 127.58, 126.43, 123.46, 115.29, 54.05; IR:

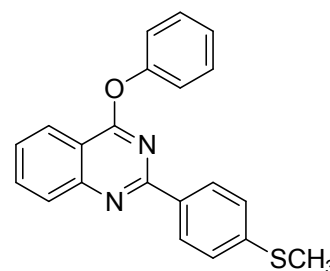

3361, 2922, 1621, 1576, 1502, 1452, 1348, 1175, 799, 690  $\text{cm}^{-1}$ ; HRMS-ESI  $[\text{M}+\text{H}]^+m/z$  calcd for  $\text{C}_{21}\text{H}_{17}\text{N}_2\text{OS}$ : 355.1624, found 355.1628.

**4-Phenoxy-2-(4-(trifluoromethoxy)phenyl)quinazoline (3d).**  $^1\text{H}$

NMR (400 MHz,  $\text{CDCl}_3$ ):  $\delta$  8.24 (t,  $J = 7.5$  Hz, 3H), 7.91 (d,  $J = 8.4$  Hz, 1H), 7.76 (dd,  $J = 11.2, 4.0$  Hz, 1H), 7.47 (t,  $J = 7.5$  Hz, 1H), 7.42 – 7.36 (m, 2H), 7.28 – 7.19 (m, 3H), 7.11 (d,  $J = 8.5$  Hz, 2H):

$^{13}\text{C}$  NMR (101 MHz,  $\text{CDCl}_3$ ):  $\delta$  166.83, 158.56, 152.66, 152.57,

151.07, 136.26, 134.10, 130.10, 129.51, 128.17, 127.09, 125.70, 123.62, 122.03, 120.47, 115.10; IR: 3392, 2921, 1607, 1562, 1486, 1162, 861, 742  $\text{cm}^{-1}$ ; HRMS-ESI  $[\text{M}+\text{H}]^+m/z$  calcd for  $\text{C}_{21}\text{H}_{14}\text{F}_3\text{N}_2\text{O}_2$ : 383.1002, found 383.1004.

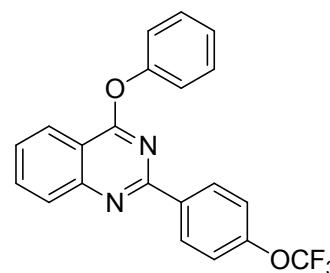

**4-Phenoxy-2-(4-(trifluoromethyl)phenyl)quinazoline (3e).**  $^1\text{H}$

NMR (400 MHz,  $\text{CDCl}_3$ ):  $\delta$  8.34 (d,  $J = 8.1$  Hz, 2H), 8.28 (d,  $J = 8.1$  Hz, 1H), 7.96 (d,  $J = 8.4$  Hz, 1H), 7.81 (t,  $J = 7.7$  Hz, 1H), 7.54 (t,  $J = 7.8$  Hz, 3H), 7.42 (t,  $J = 7.8$  Hz, 2H), 7.30 – 7.24 (m, 3H);  $^{13}\text{C}$  NMR

(101 MHz,  $\text{CDCl}_3$ ):  $\delta$  167.76, 159.26, 153.46, 153.36, 141.82,

135.04, 130.35, 129.52, 129.15, 128.26, 126.58, 126.13, 126.10, 124.49, 122.83, 116.16; IR: 3387, 2921, 2350, 1744, 1622, 1324, 1111, 690  $\text{cm}^{-1}$ ; HRMS-ESI  $[\text{M}+\text{H}]^+m/z$  calcd for  $\text{C}_{21}\text{H}_{14}\text{F}_3\text{N}_2\text{O}$ : 367.1053, found 367.1055.

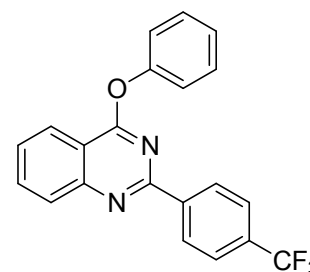

**General procedure for the preparation of (E)-2-Phenoxy-3-styrylquinoxaline(5a-e) with aryne:**

To a stirred solution of (E)-3-styrylquinoxalin-2(1H)-one(4a-e) (0.28mmol, 1.0 equiv) and trimethylsilyl phenyl triflate (**2**) (0.33mmol, 1.2 equiv) in acetonitrile as solvent, was added Cesium fluoride (1.35mmol, 3.0 equiv) at room temperature. The mixture was stirred at room temperature for 4hr, after completing the reaction, reaction mixture was concentrated in vacuo. To the resulting residue, water was added, and the mixture was extracted with ethyl acetate three times. The combined organic phase was dried over sodium sulphate, and concentrated in vacuo. The crude product was purified by column chromatography (EtoAc in Hexane), resulting the product.

**(E)-2-(4-Methoxystyryl)-3-phenoxyquinoxaline (5a).**  $^1\text{H}$  NMR

(400 MHz,  $\text{CDCl}_3$ ):  $\delta$  8.04 (d,  $J = 16.0$  Hz, 1H), 7.96 – 7.91 (m,

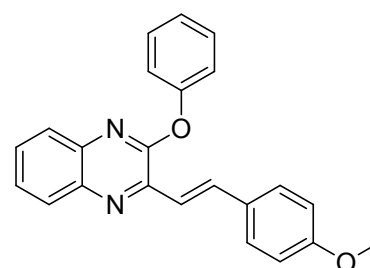

1H), 7.62 – 7.54 (m, 4H), 7.52 – 7.44 (m, 2H), 7.40 (t,  $J = 7.8$  Hz, 2H), 7.21 (dd,  $J = 13.1$ , 11.1 Hz, 3H), 6.86 (d,  $J = 8.6$  Hz, 2H), 3.77 (s, 3H).  $^{13}\text{C}$  NMR (101 MHz,  $\text{CDCl}_3$ ):  $\delta$  160.58, 155.15, 153.11, 144.33, 139.95, 139.30, 137.27, 129.59, 129.37, 129.29, 129.04, 128.38, 127.52, 127.28, 125.28, 121.86, 118.65, 114.30, 55.38. IR: 3361, 2922, 1621, 1576, 1502, 1452, 1348, 1175, 799, 690  $\text{cm}^{-1}$ ; HRMS-ESI  $[\text{M}+\text{H}]^+ m/z$  calcd for  $\text{C}_{23}\text{H}_{19}\text{N}_2\text{O}_2$ : 355.1441, found 355.1447.

**(E)-3-(4-Methoxystyryl)-1-phenylquinoxalin-2(1H)-one**

**(6a).**  $^1\text{H}$  NMR (400 MHz,  $\text{CDCl}_3$ ):  $\delta$  8.13 (d,  $J = 16.2$  Hz, 1H), 7.84 – 7.78 (m, 1H), 7.59 – 7.45 (m, 6H), 7.28 – 7.16 (m, 4H), 6.84 (d,  $J = 8.6$  Hz, 2H), 6.57 (d,  $J = 8.1$  Hz, 1H), 3.76 (s, 3H).  $^{13}\text{C}$  NMR (101 MHz,  $\text{CDCl}_3$ ):  $\delta$  160.73, 154.93, 153.36, 138.57, 136.13, 133.64, 133.43, 130.31, 129.50, 129.41, 129.40, 129.32, 129.07, 128.30, 124.00, 120.27, 115.40, 114.31, 55.37. IR: 3361, 2922, 1621, 1576, 1502, 1452, 1348, 1175, 799, 690  $\text{cm}^{-1}$ ; HRMS-ESI  $[\text{M}+\text{H}]^+ m/z$  calcd for  $\text{C}_{23}\text{H}_{19}\text{N}_2\text{O}_2$ : 355.1441, found 355.1435.

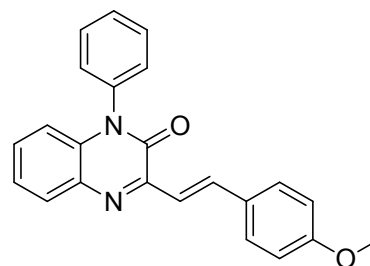

**(E)-2-Phenoxy-3-(3,4,5-trimethoxystyryl)quinoxaline**

**(5b).**  $^1\text{H}$  NMR (400 MHz,  $\text{CDCl}_3$ ):  $\delta$  8.11 (d,  $J = 16.0$  Hz, 1H), 8.02 (dd,  $J = 7.8$ , 1.7 Hz, 1H), 7.70 – 7.62 (m, 2H), 7.57 (ddd,  $J = 7.6$ , 5.2, 1.8 Hz, 2H), 7.52 – 7.47 (m, 2H), 7.35 – 7.29 (m, 3H), 6.94 (s, 2H), 3.94 (s, 6H), 3.91 (s, 3H).  $^{13}\text{C}$  NMR (126 MHz,  $\text{CDCl}_3$ ):  $\delta$  155.25, 153.46, 152.99, 143.81, 139.87, 139.40, 139.22, 137.73, 132.13, 129.68, 129.37, 128.41, 127.65, 127.30, 125.45, 122.01, 120.37, 104.83, 61.04, 56.23. IR: 3361, 2922, 1621, 1576, 1502, 1452, 1348, 1175, 799, 690  $\text{cm}^{-1}$ ; HRMS-ESI  $[\text{M}+\text{H}]^+ m/z$  calcd for  $\text{C}_{25}\text{H}_{23}\text{N}_2\text{O}_4$ : 415.1652, found 415.1653.

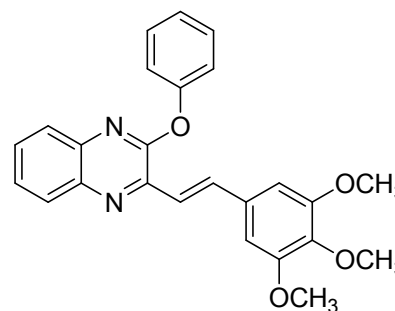

**(E)-1-Phenyl-3-(3,4,5-trimethoxystyryl)quinoxalin-2(1H)-one (6b).**

$^1\text{H}$  NMR (400 MHz,  $\text{CDCl}_3$ ):  $\delta$  8.21 (d,  $J = 16.1$  Hz, 1H), 7.92 – 7.87 (m, 1H), 7.67 – 7.54 (m, 4H), 7.36 – 7.27 (m, 4H), 6.90 (s, 2H), 6.67 (dd,  $J = 7.8$ , 1.8 Hz, 1H), 3.90 (s, 6H), 3.89 (s, 3H).  $^{13}\text{C}$  NMR (126 MHz,  $\text{CDCl}_3$ ):  $\delta$  154.92, 153.38, 152.89, 139.28, 139.01, 135.98, 133.62, 133.37, 132.14, 130.34, 129.49, 129.46, 129.40, 128.23, 124.16, 122.00, 115.49, 104.88, 61.01, 56.11. IR: 3361, 2922, 1621, 1576, 1502, 1452, 1348, 1175, 799, 690  $\text{cm}^{-1}$ ; HRMS-ESI  $[\text{M}+\text{H}]^+ m/z$  calcd for  $\text{C}_{25}\text{H}_{23}\text{N}_2\text{O}_4$ : 415.1652, found 415.1606.

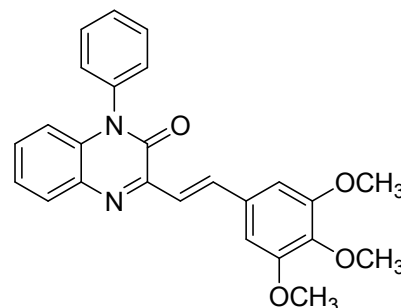

**2-((E)-2-(Benzo[d][1,3]dioxol-5-yl)vinyl)-3-**

**phenoxyquinoxaline (5c).** <sup>1</sup>H NMR (400 MHz, CDCl<sub>3</sub>): δ 8.11

(d, *J* = 15.9 Hz, 1H), 8.05 (dd, *J* = 7.8, 1.4 Hz, 1H), 7.70 (dd, *J* = 7.8, 1.5 Hz, 1H), 7.64 (d, *J* = 16.0 Hz, 1H), 7.59 (td, *J* = 7.3, 1.6 Hz, 2H), 7.52 (t, *J* = 7.9 Hz, 2H), 7.36 – 7.31 (m, 3H), 7.29 (s,

1H), 7.20 (d, *J* = 8.0 Hz, 1H), 6.88 (d, *J* = 8.0 Hz, 1H), 6.03 (s, 2H). <sup>13</sup>C NMR (101 MHz, CDCl<sub>3</sub>): δ 155.14, 153.04, 148.72, 148.33, 144.09, 139.91, 139.35, 137.29, 131.08, 129.62, 129.16, 128.41, 127.58, 127.29, 125.33, 123.73, 121.87, 119.02, 108.58, 106.40, 101.42. IR: 3361, 2922, 1621, 1576, 1502, 1452, 1348, 1175, 799, 690 cm<sup>-1</sup>; HRMS-ESI [M+H]<sup>+</sup>*m/z* calcd for C<sub>23</sub>H<sub>17</sub>N<sub>2</sub>O<sub>3</sub>: 369.1234, found 369.1243.

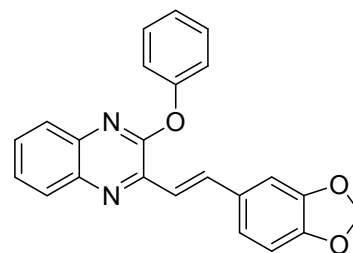

**(E)-3-(2-(Benzo[d][1,3]dioxol-5-yl)vinyl)-1-phenylquinoxalin-**

**2(1H)-one (6c).** <sup>1</sup>H NMR (400 MHz, CDCl<sub>3</sub>): δ 8.19 (d, *J* = 16.1 Hz, 1H), 7.94 – 7.88 (m, 1H), 7.66 (t, *J* = 7.4 Hz, 2H), 7.59 (t, *J* = 12.0 Hz, 2H), 7.33 (t, *J* = 7.1 Hz, 3H), 7.26 (d, *J* = 20.9 Hz, 2H), 7.15 (d, *J* = 8.1 Hz, 1H), 6.85 (d, *J* = 8.0 Hz, 1H), 6.68 (d, *J* = 7.7

Hz, 1H), 6.03 (s, 2H). <sup>13</sup>C NMR (101 MHz, CDCl<sub>3</sub>): δ 154.91, 153.17, 148.87, 148.29, 138.61, 136.07, 133.65, 133.39, 131.14, 130.34, 129.46, 129.36, 129.20, 128.27, 124.07, 124.05, 120.70, 115.42, 108.56, 106.44, 101.40. IR: 3361, 2922, 1621, 1576, 1502, 1452, 1348, 1175, 799, 690 cm<sup>-1</sup>; HRMS-ESI [M+H]<sup>+</sup>*m/z* calcd for C<sub>23</sub>H<sub>17</sub>N<sub>2</sub>O<sub>3</sub>: 369.1234, found 369.1237.

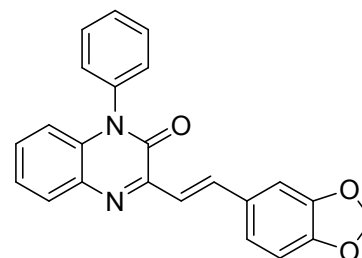

**(E)-2-Phenoxy-3-(4-**

**(trifluoromethyl)styryl)quinoxaline(5d).** <sup>1</sup>H NMR (400 MHz, CDCl<sub>3</sub>): δ 8.10 (d, *J* = 16.1 Hz, 1H), 8.01 – 7.96 (m, 1H), 7.77 (dd, *J* = 21.8, 12.1 Hz, 3H), 7.63 (ddd, *J* = 15.1, 8.5, 5.1 Hz, 3H), 7.56 – 7.50 (m, 2H), 7.46 – 7.40 (m, 2H), 7.29 – 7.18 (m, 3H). <sup>13</sup>C NMR (126 MHz, CDCl<sub>3</sub>): δ 155.26, 152.88, 143.17,

139.88, 139.83, 139.74, 135.70, 129.84, 129.68, 128.66, 127.83, 127.79, 127.37, 125.80, 125.77, 125.49, 123.38, 121.87. IR: 3361, 2922, 1621, 1576, 1502, 1452, 1348, 1175, 799, 690 cm<sup>-1</sup>; HRMS-ESI [M+H]<sup>+</sup>*m/z* calcd for C<sub>23</sub>H<sub>16</sub>F<sub>3</sub>N<sub>2</sub>O: 393.1209, found 393.1225.

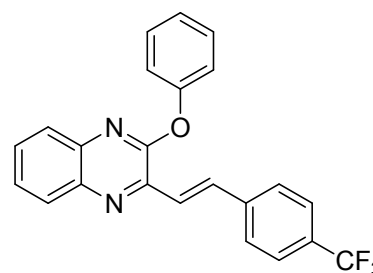

**(E)-1-Phenyl-3-(4-(trifluoromethyl)styryl)quinoxalin-2(1H)-**

**one (6d).** <sup>1</sup>H NMR (500 MHz, CDCl<sub>3</sub>): δ 8.17 (d, *J* = 16.2 Hz, 1H), 7.87 – 7.82 (m, 1H), 7.68 (dd, *J* = 14.2, 12.3 Hz, 3H), 7.56 (dd, *J* = 10.1, 4.7 Hz, 4H), 7.51 (d, *J* = 7.5 Hz, 1H), 7.28 – 7.21

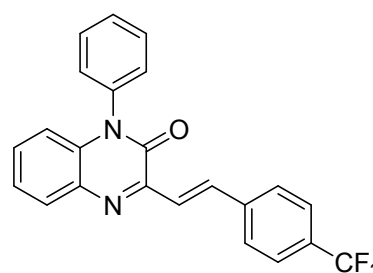

(m, 4H), 6.62 – 6.57 (m, 1H). <sup>13</sup>C NMR (126 MHz, CDCl<sub>3</sub>): δ 154.82, 152.55, 139.91, 136.95, 135.87, 133.88, 133.25, 130.42, 130.00, 129.74, 129.60, 128.21, 127.94, 125.79, 125.76, 124.99, 124.23, 115.55. IR: 3361, 2922, 1621, 1576, 1502, 1452, 1348, 1175, 799, 690 cm<sup>-1</sup>; HRMS-ESI [M+H]<sup>+</sup> *m/z* calcd for C<sub>23</sub>H<sub>16</sub>F<sub>3</sub>N<sub>2</sub>O: 393.1209, found 393.1218.

**(E)-2-(2-Chlorostyryl)-3-phenoxyquinoxaline (5e).** <sup>1</sup>H NMR (500

MHz, CDCl<sub>3</sub>): δ 8.02 (d, *J* = 16.0 Hz, 1H), 7.94 (dd, *J* = 8.0, 1.8 Hz, 1H), 7.67 (d, *J* = 16.0 Hz, 1H), 7.62 – 7.58 (m, 1H), 7.56 (d, *J* = 8.6 Hz, 2H), 7.51 – 7.48 (m, 2H), 7.40 (t, *J* = 7.9 Hz, 2H), 7.30 (d, *J* = 8.5 Hz, 2H), 7.22 (dd, *J* = 5.9, 4.9 Hz, 2H), 7.18 – 7.16 (m, 1H). <sup>13</sup>C NMR (126

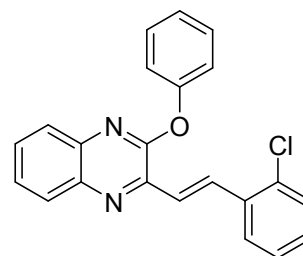

MHz, CDCl<sub>3</sub>): δ 154.15, 151.90, 142.55, 138.82, 138.53, 135.08, 133.96, 133.83, 128.59, 128.50, 128.03, 127.88, 127.51, 126.64, 126.30, 124.36, 120.80, 120.44, 28.68. IR: 3361, 2922, 1621, 1576, 1502, 1452, 1348, 1175, 799, 690 cm<sup>-1</sup>; HRMS-ESI [M+H]<sup>+</sup> *m/z* calcd for C<sub>22</sub>H<sub>16</sub>ClN<sub>2</sub>O: 359.0946, found 359.0951.

**(E)-3-(2-Chlorostyryl)-1-phenylquinoxalin-2(1H)-one (6e).** <sup>1</sup>H NMR

(400 MHz, CDCl<sub>3</sub>): δ 8.12 (d, *J* = 16.2 Hz, 1H), 7.87 – 7.81 (m, 1H), 7.65 – 7.49 (m, 5H), 7.27 (ddd, *J* = 8.9, 7.2, 5.3 Hz, 6H), 7.19 (s, 1H), 6.60 (dd, *J* = 7.6, 2.0 Hz, 1H). <sup>13</sup>C NMR (126 MHz, MeOD): δ 154.95, 152.42, 136.68, 136.01, 135.07, 134.79, 133.74, 133.23, 130.08,

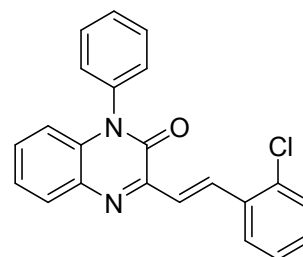

129.70, 129.35, 129.07, 128.85, 128.76, 128.12, 124.12, 122.03, 115.36. IR: 3361, 2922, 1621, 1576, 1502, 1452, 1348, 1175, 799, 690 cm<sup>-1</sup>; HRMS-ESI [M+H]<sup>+</sup> *m/z* calcd for C<sub>22</sub>H<sub>16</sub>ClN<sub>2</sub>O: 359.0946, found 359.0952.

**General procedure for the preparation of 2-phenoxy pyridine derivatives(8a-f) with aryne**

To a stirred solution of 4, 6-diphenylpyridin-2(1H)-one (**7a-f**) (0.24mmol, 1.0 equiv) and trimethylsilyl phenyl triflate (**2**) (0.29mmol, 1.2 equiv) in acetonitrile as solvent, was added Cesium fluoride (0.72mmol, 3.0 equiv) at room temperature. The mixture was stirred at room temperature for 4hr, after completing the reaction, reaction mixture was concentrated in vacuo. To the resulting residue, water was added, and the mixture was extracted with ethyl acetate three times. The combined organic phase was dried over sodium sulphate, and concentrated in vacuo. The crude product was purified by column chromatography (EtoAc in Hexane), resulting the product.

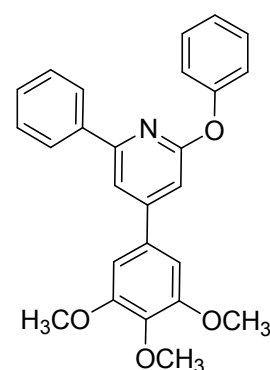

**2-Phenoxy-6-phenyl-4-(3,4,5-trimethoxyphenyl)pyridine (8a).**  $^1\text{H}$  NMR (400 MHz,  $\text{CDCl}_3$ ):  $\delta$  7.87 (dd,  $J = 8.0, 1.4$  Hz, 2H), 7.54 (d,  $J = 1.1$  Hz, 1H), 7.36 – 7.27 (m, 5H), 7.17 (dd,  $J = 8.6, 0.9$  Hz, 2H), 7.12 (dd,  $J = 11.5, 4.2$  Hz, 1H), 6.89 (d,  $J = 1.0$  Hz, 1H), 6.75 (s, 2H), 3.84 (s, 6H), 3.82 (s, 3H).  $^{13}\text{C}$  NMR (126 MHz,  $\text{CDCl}_3$ ):  $\delta$  163.92, 156.01, 154.38, 153.73, 153.26, 139.05, 138.49, 134.35, 129.54, 129.26, 128.70, 126.92, 124.45, 121.12, 113.54, 107.61, 104.44, 61.04, 56.36. IR: 3345, 2922, 1592, 1649, 1489, 1370, 1306, 1127, 1017, 773, 694  $\text{cm}^{-1}$ ; HRMS-ESI  $[\text{M}+\text{H}]^+m/z$  calcd for  $\text{C}_{26}\text{H}_{24}\text{NO}_4$ : 414.17, found 414.1687.

**2-(4-Methoxyphenyl)-6-phenoxy-4-(3,4,5-**

**trimethoxyphenyl)pyridine (8b).**  $^1\text{H}$  NMR (400 MHz,  $\text{CDCl}_3$ ):  $\delta$

7.95 (d,  $J = 8.9$  Hz, 2H), 7.59 (d,  $J = 1.2$  Hz, 1H), 7.45 (dd,  $J = 8.5, 7.4$  Hz, 2H), 7.28 (dd,  $J = 8.6, 1.0$  Hz, 2H), 7.24 (dd,  $J = 11.5, 4.2$  Hz, 1H), 6.95 (dd,  $J = 9.0, 5.0$  Hz, 3H), 6.87 (s, 2H), 3.97 (s, 6H), 3.94 (s, 3H), 3.86 (s, 3H).  $^{13}\text{C}$  NMR (101 MHz,

$\text{CDCl}_3$ ):  $\delta$  163.83, 160.68, 155.73, 154.50, 153.72, 153.15,

139.14, 134.48, 131.13, 129.47, 128.23, 124.32, 121.09, 114.04, 112.63, 106.76, 104.57, 60.98, 56.37, 55.34. IR: 3361, 2922, 1621, 1576, 1502, 1452, 1348, 1175, 799, 690  $\text{cm}^{-1}$ ; HRMS-ESI  $[\text{M}+\text{H}]^+m/z$  calcd for  $\text{C}_{27}\text{H}_{26}\text{NO}_5$ : 444.1805, found 444.1799.

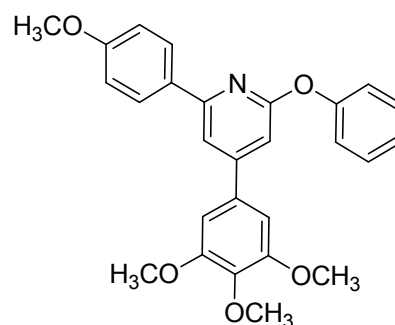

**4-(3-Nitrophenyl)-2-phenoxy-6-phenylpyridine (8c).**  $^1\text{H}$  NMR (400

MHz,  $\text{CDCl}_3$ ):  $\delta$  8.40 (t,  $J = 1.9$  Hz, 1H), 8.19 (ddd,  $J = 8.2, 2.2, 1.0$  Hz, 1H), 7.86 (ddd,  $J = 4.6, 2.4, 1.4$  Hz, 3H), 7.56 (dd,  $J = 11.3, 4.6$  Hz, 2H), 7.32 (ddd,  $J = 8.1, 6.2, 4.6$  Hz, 5H), 7.19 – 7.11 (m, 3H), 6.91 (d,  $J = 1.2$  Hz, 1H).  $^{13}\text{C}$  NMR (126 MHz,  $\text{CDCl}_3$ ):  $\delta$  164.20,

156.60, 154.08, 150.45, 148.79, 140.18, 137.99, 133.09, 130.21,

129.63, 129.56, 128.77, 126.93, 124.74, 123.82, 122.09, 121.27, 113.10, 107.50. IR: 3398, 2921, 1551, 1489, 1390, 1214, 772, 693  $\text{cm}^{-1}$ ; HRMS-ESI  $[\text{M}+\text{H}]^+m/z$  calcd for  $\text{C}_{23}\text{H}_{17}\text{N}_2\text{O}_3$ : 369.1234, found 369.1232.

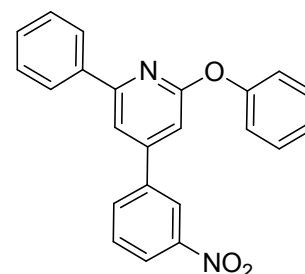

**4-(4-Bromophenyl)-2-(4-chlorophenyl)-6-phenoxy**

**pyridine (8d).**  $^1\text{H}$  NMR (400 MHz,  $\text{CDCl}_3$ ):  $\delta$  7.80 (d,  $J = 8.7$  Hz, 2H), 7.51 (dd,  $J = 12.8, 4.9$  Hz, 3H), 7.44 – 7.39 (m, 2H), 7.37 – 7.31 (m, 2H), 7.29 (d,  $J = 8.7$  Hz, 2H), 7.18 – 7.12 (m, 3H), 6.87 (d,  $J = 1.2$  Hz, 1H).  $^{13}\text{C}$  NMR (126 MHz,  $\text{CDCl}_3$ ):  $\delta$  164.18, 154.98, 154.12, 151.97, 137.17, 136.73, 135.40, 132.32, 129.64, 128.89, 128.68,

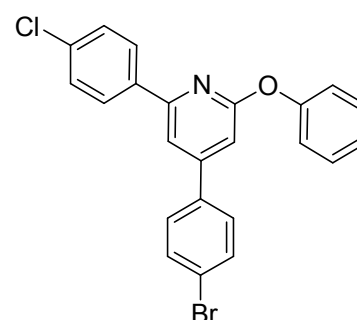



128.16, 124.71, 123.74, 121.24, 112.87, 107.39. IR: 3389, 2921, 1649, 1594, 1488, 1377, 1182, 1011, 763  $\text{cm}^{-1}$ ; HRMS-ESI  $[\text{M}+\text{H}]^+ m/z$  calcd for  $\text{C}_{23}\text{H}_{16}\text{BrClNO}$ : 436.0098, found 436.0095.

**6-Phenoxy-4-phenyl-2,2'-bipyridine (8e).**  $^1\text{H}$  NMR (500 MHz,  $\text{CDCl}_3$ ):  $\delta$  8.73 – 8.70 (m, 1H), 8.51 (d,  $J$  = 1.3 Hz, 1H), 8.25 (d,  $J$  = 8.0 Hz, 1H), 7.81 – 7.75 (m, 3H), 7.55 – 7.46 (m, 5H), 7.31 (dt,  $J$  = 15.8, 4.2 Hz, 4H), 7.16 (d,  $J$  = 1.3 Hz, 1H).  $^{13}\text{C}$  NMR (126 MHz,  $\text{CDCl}_3$ ):  $\delta$  163.89, 155.46, 154.69, 154.42, 153.27, 149.04, 138.14,

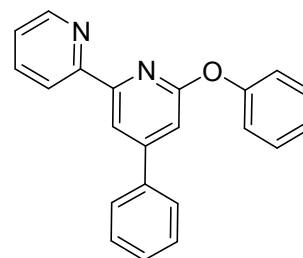

136.96, 129.62, 129.24, 129.02, 127.23, 124.53, 123.89, 121.45, 121.21, 114.18, 108.91. IR: 3345, 2921, 2851, 1584, 1551, 1490, 1393, 1358, 1214, 949, 763  $\text{cm}^{-1}$ ; HRMS-ESI  $[\text{M}+\text{H}]^+ m/z$  calcd for  $\text{C}_{22}\text{H}_{17}\text{N}_2\text{O}$ : 325.1335, found 325.1337.

**4-(Furan-2-yl)-2-phenoxy-6-phenylpyridine (8f).**  $^1\text{H}$  NMR (400 MHz,  $\text{CDCl}_3$ ):  $\delta$  7.89 (dd,  $J$  = 8.1, 1.5 Hz, 2H), 7.66 (d,  $J$  = 1.1 Hz, 1H), 7.48 – 7.45 (m, 1H), 7.38 – 7.28 (m, 5H), 7.19 – 7.11 (m, 3H), 6.94 (d,  $J$  = 1.1 Hz, 1H), 6.81 (dd,  $J$  = 3.4, 0.5 Hz, 1H), 6.46 (dd,  $J$  = 3.4, 1.8 Hz, 1H).  $^{13}\text{C}$  NMR (101 MHz,  $\text{CDCl}_3$ ):  $\delta$  164.13, 156.25,

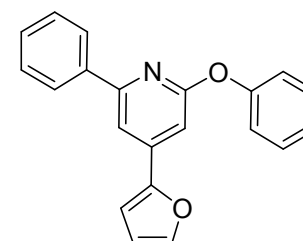

154.40, 151.49, 143.77, 141.75, 138.36, 129.56, 129.24, 128.64, 126.87, 124.46, 121.12, 112.10, 109.73, 108.95, 103.37. IR: 3398, 2921, 1594, 1559, 1489, 1397, 1215, 1020, 772  $\text{cm}^{-1}$ ; HRMS-ESI  $[\text{M}+\text{H}]^+ m/z$  calcd for  $\text{C}_{21}\text{H}_{16}\text{NO}_2$ : 314.1176, found 314.118.

**$^1\text{H}$  &  $^{13}\text{C}$  NMR of 4-Phenoxy-2-phenylquinazoline (3a)**

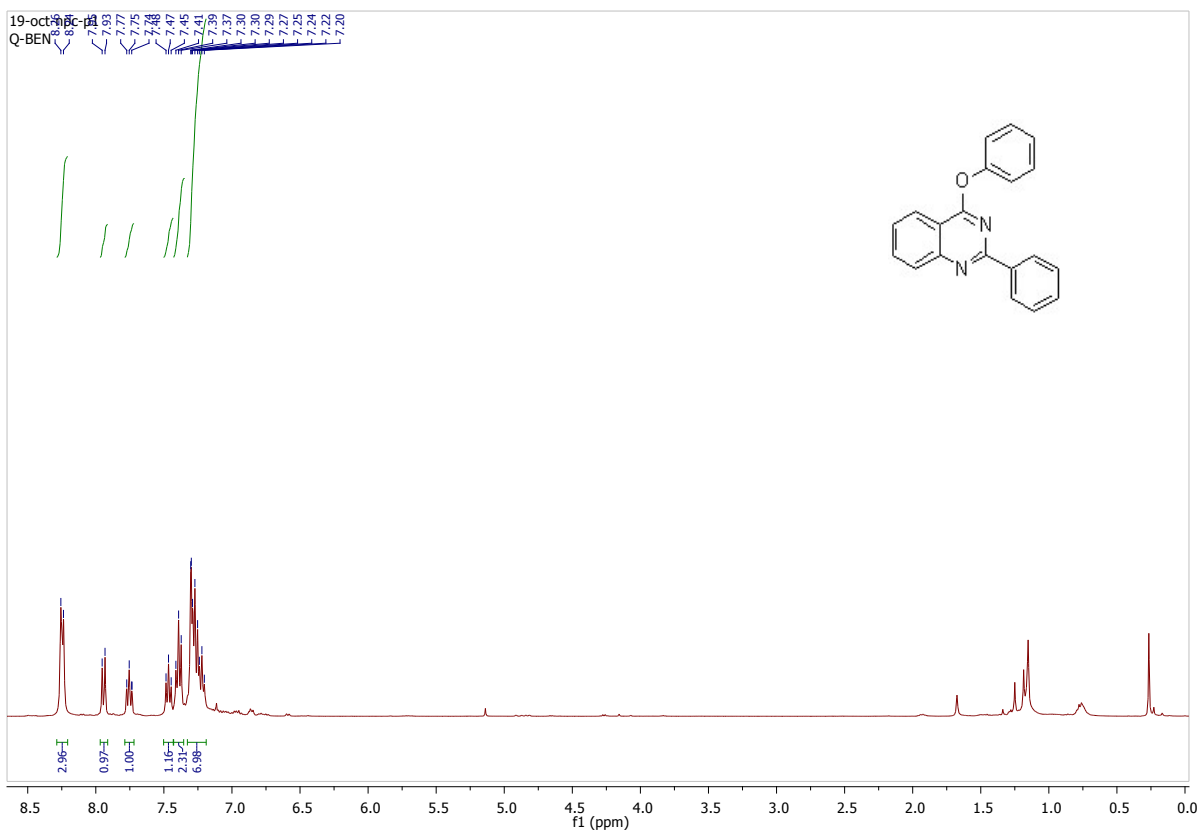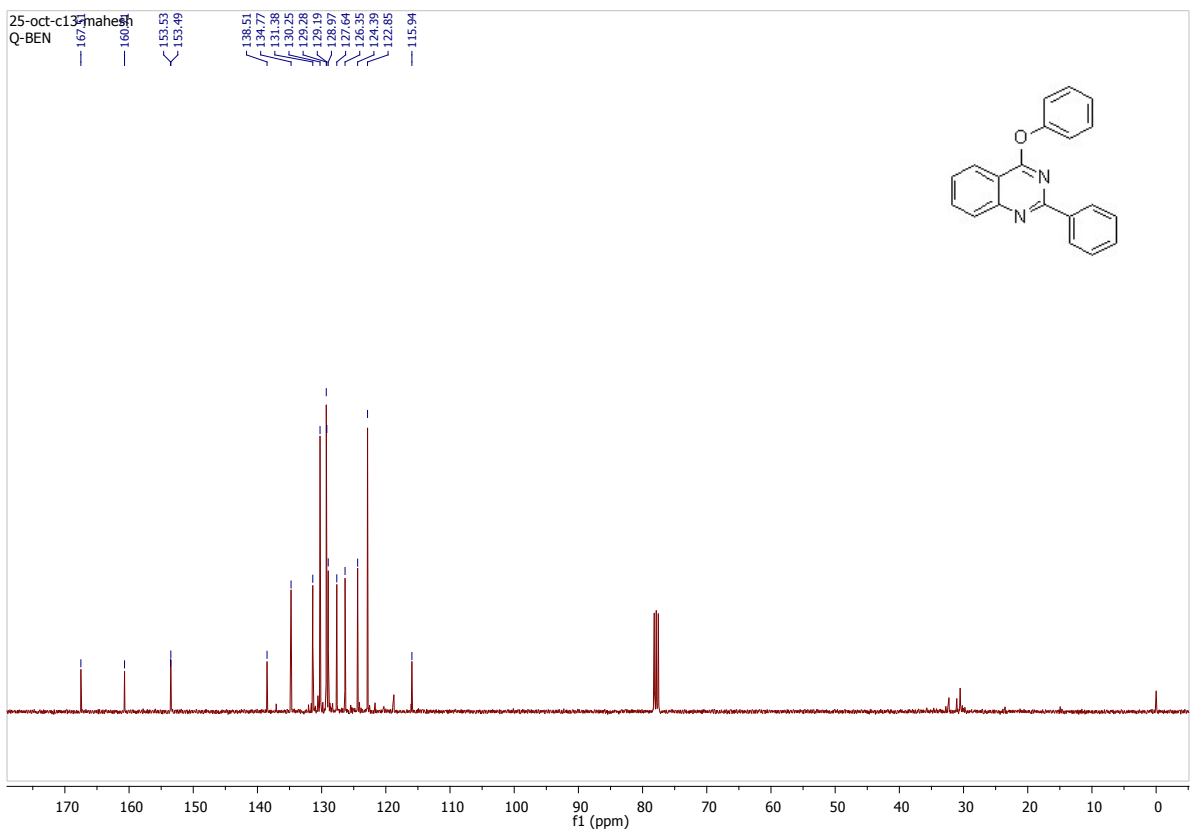

# <sup>1</sup>H & <sup>13</sup>C NMR of 4-Phenoxy-2-(3,4,5-trimethoxyphenyl)quinazoline (3b)

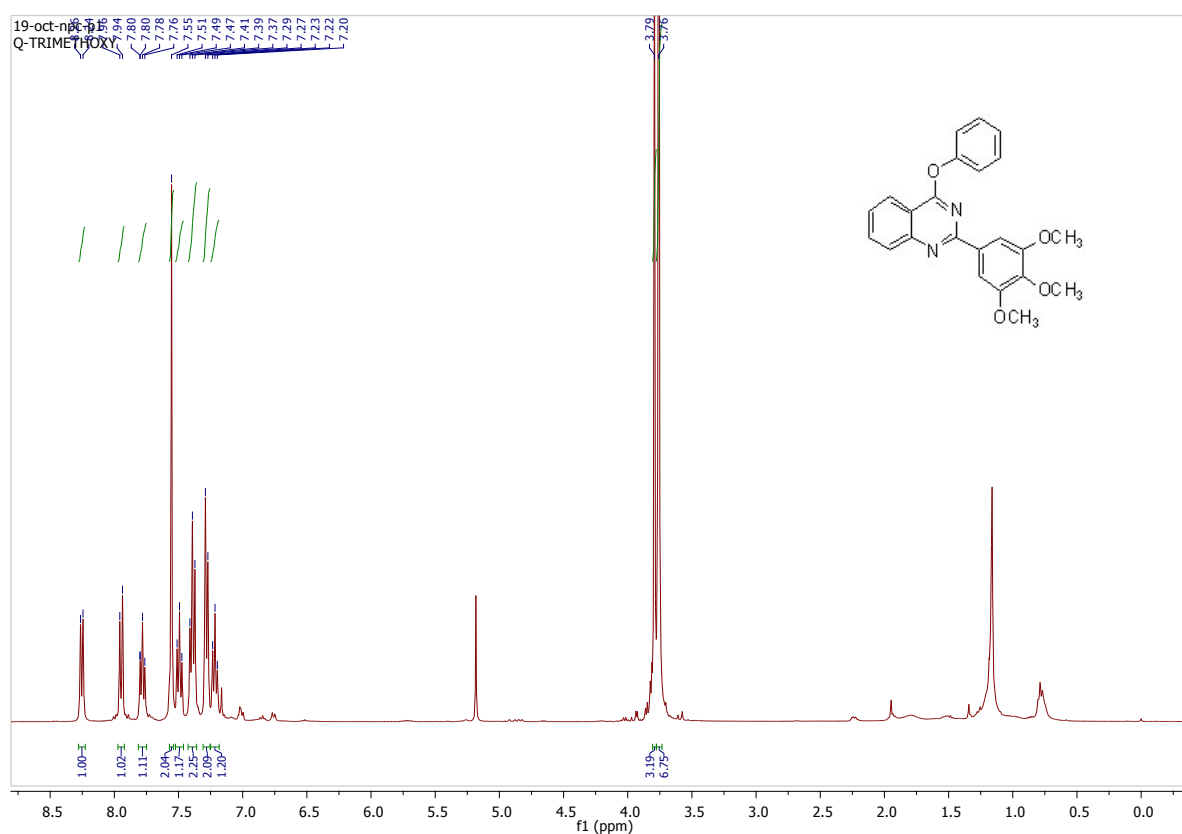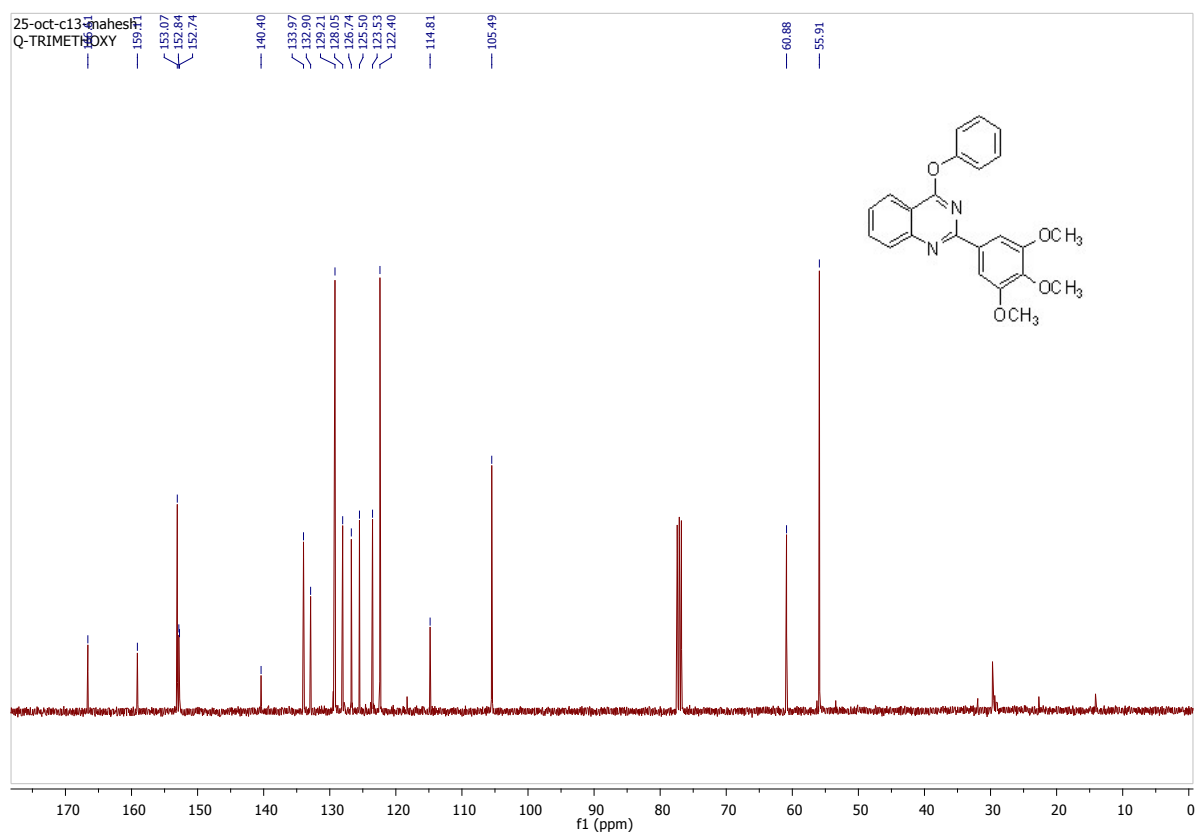

# <sup>1</sup>H & <sup>13</sup>C NMR of 2-(4-(Methylthio)phenyl)-4-phenoxyquinazoline(3c)

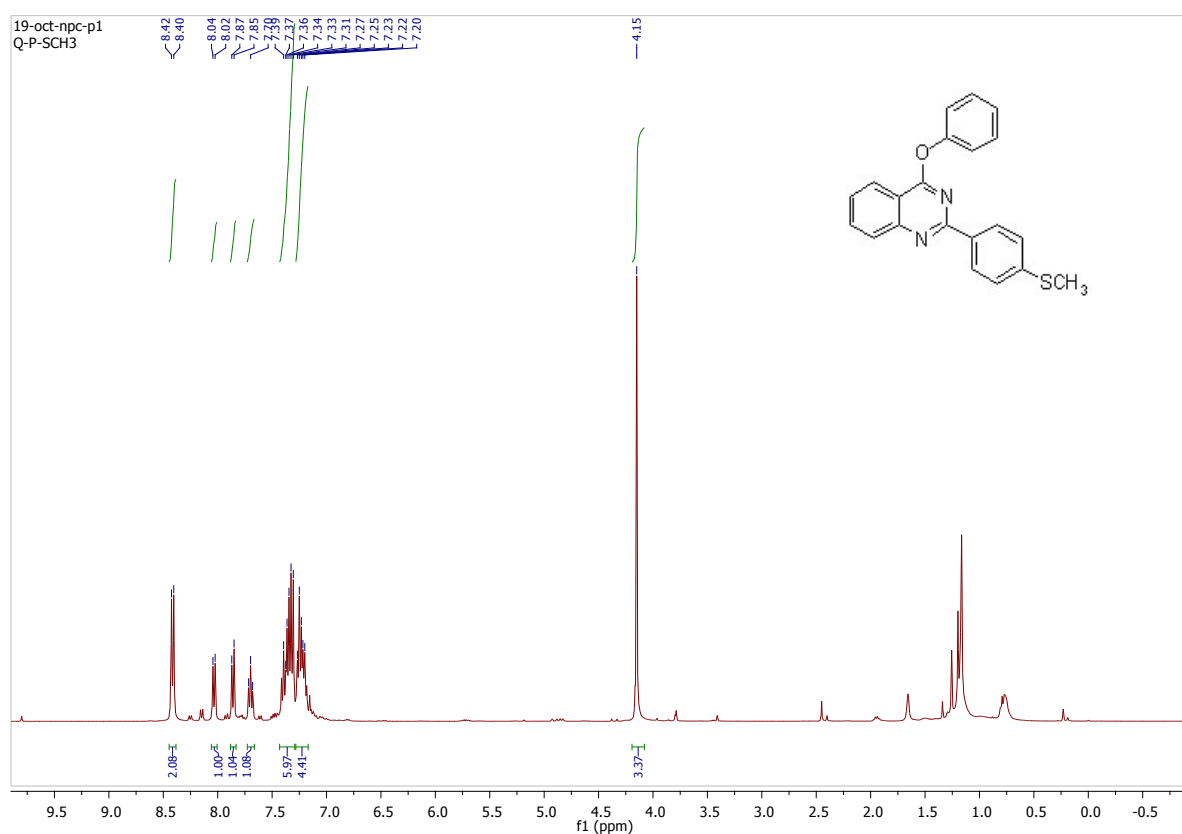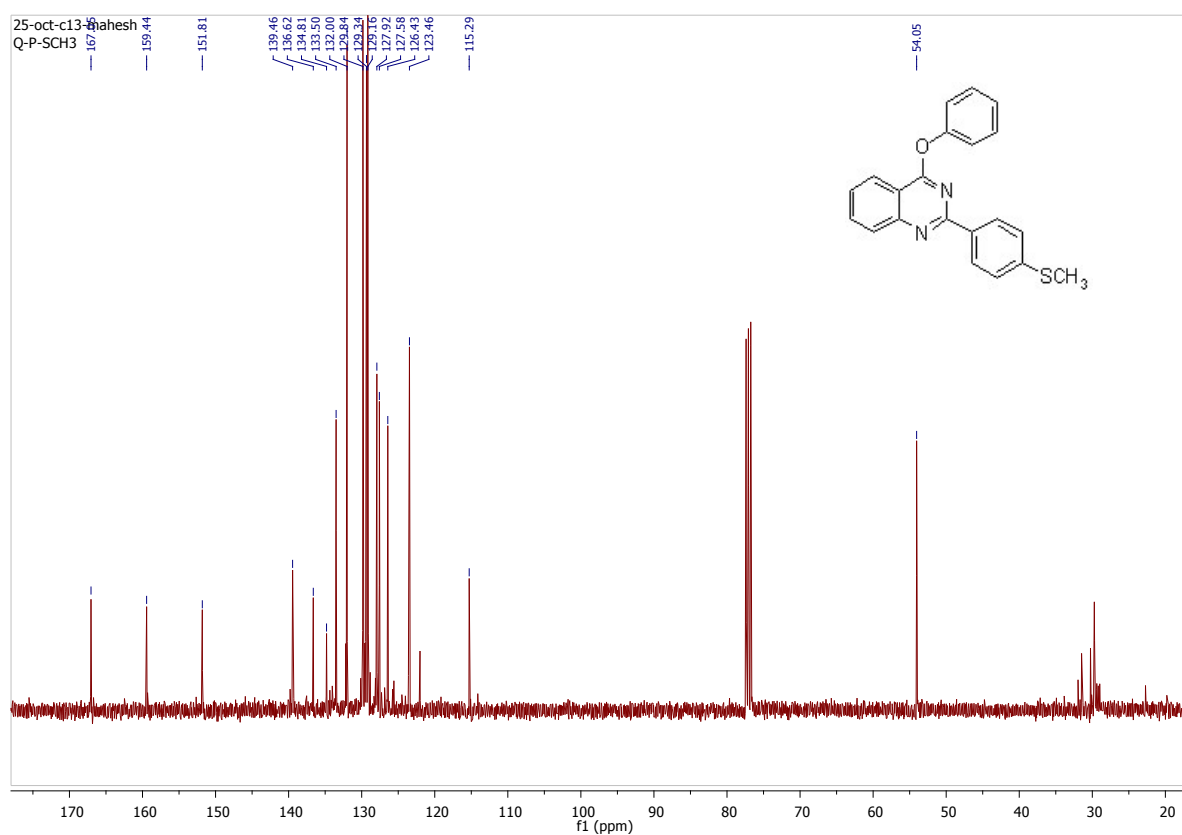

# <sup>1</sup>H & <sup>13</sup>C NMR of 4-Phenoxy-2-(4-(trifluoromethoxy)phenyl)quinazoline (3d)

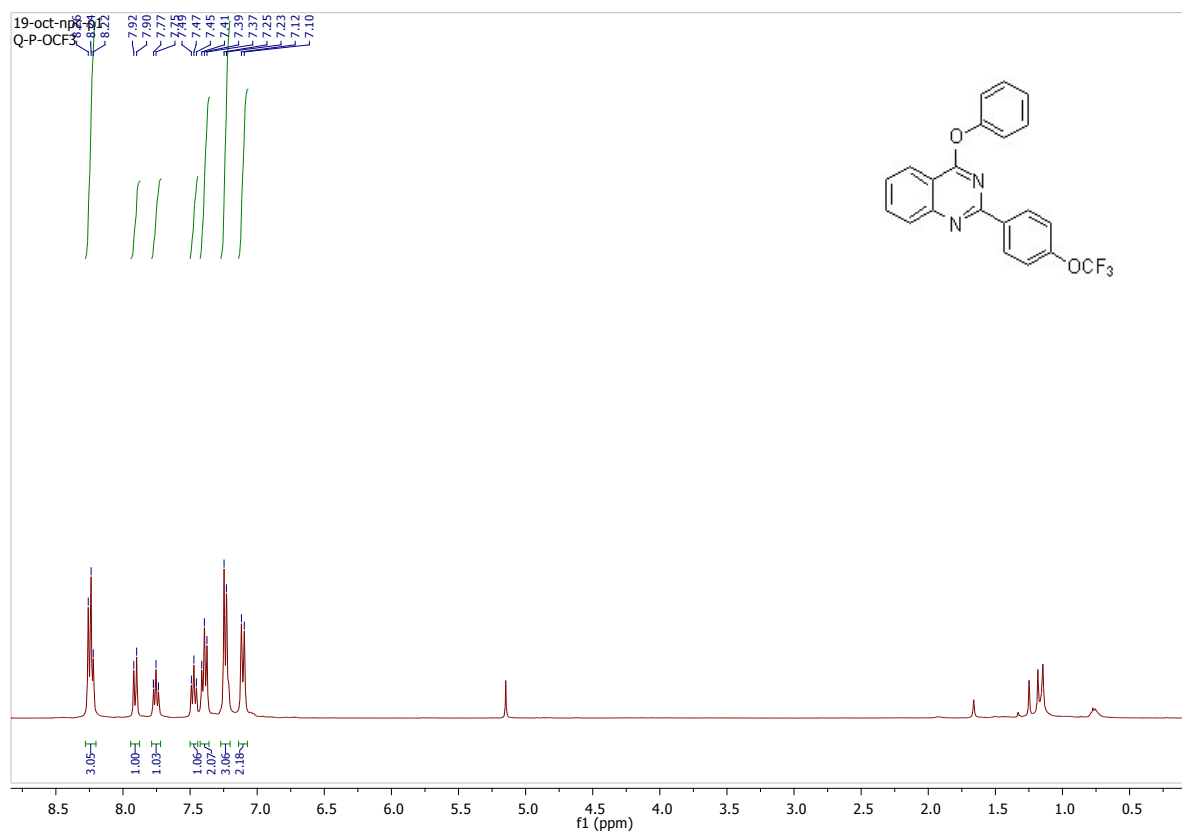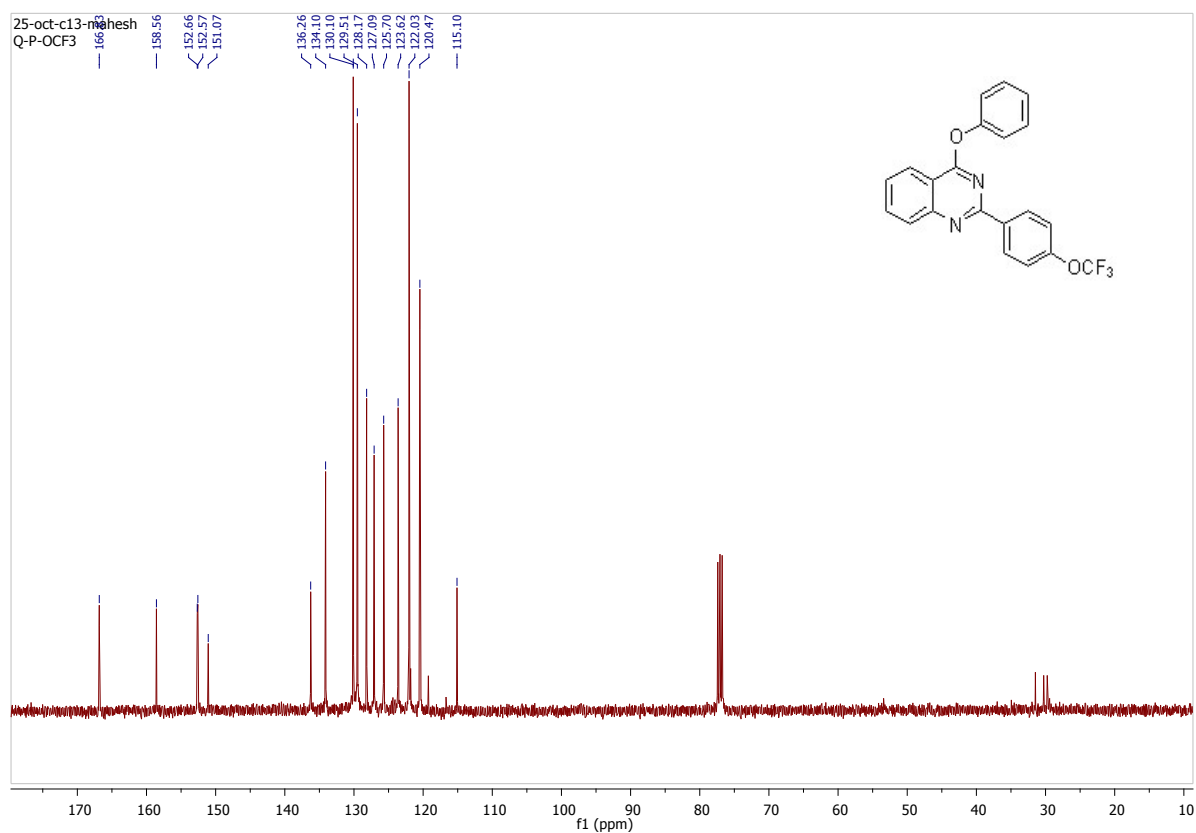

# <sup>1</sup>H & <sup>13</sup>C NMR of 4-Phenoxy-2-(4-(trifluoromethyl)phenyl)quinazoline (3e)

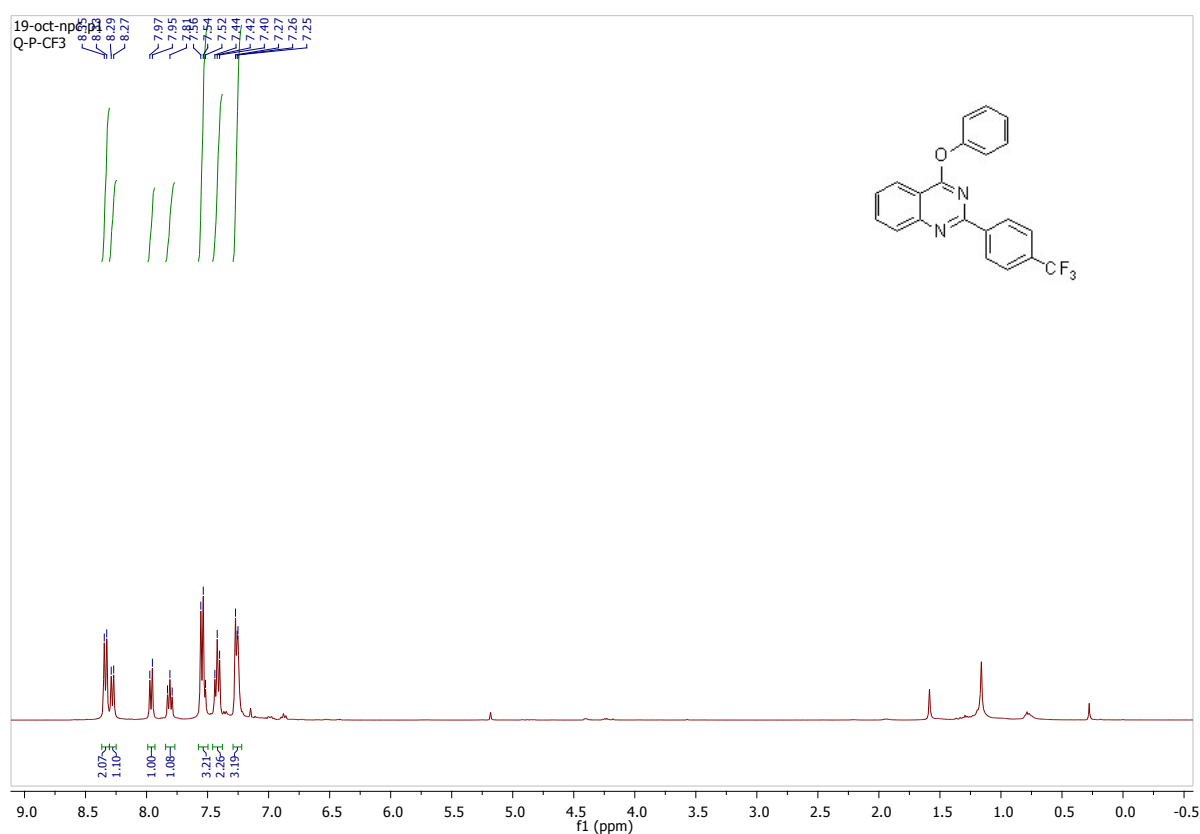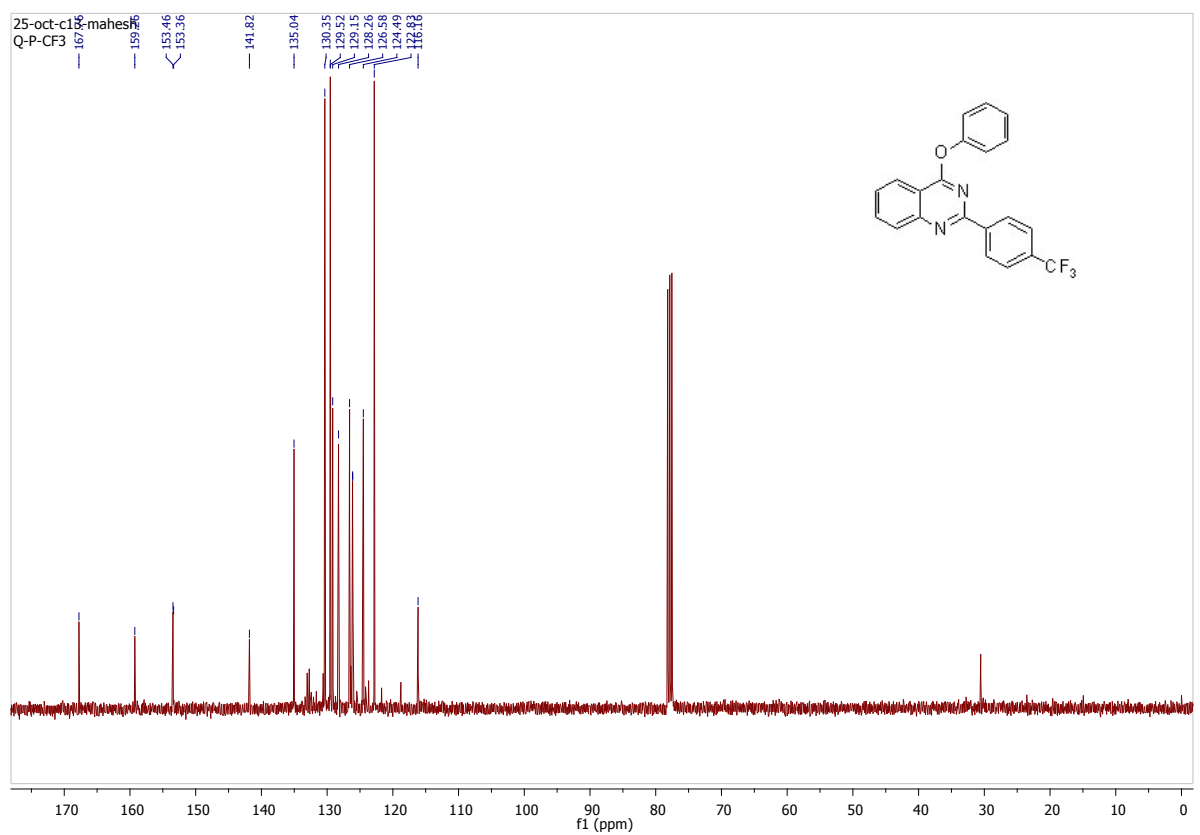

**$^1\text{H}$  &  $^{13}\text{C}$  NMR of (*E*)-2-(4-Methoxystyryl)-3-phenoxyquinoxaline(5a)**

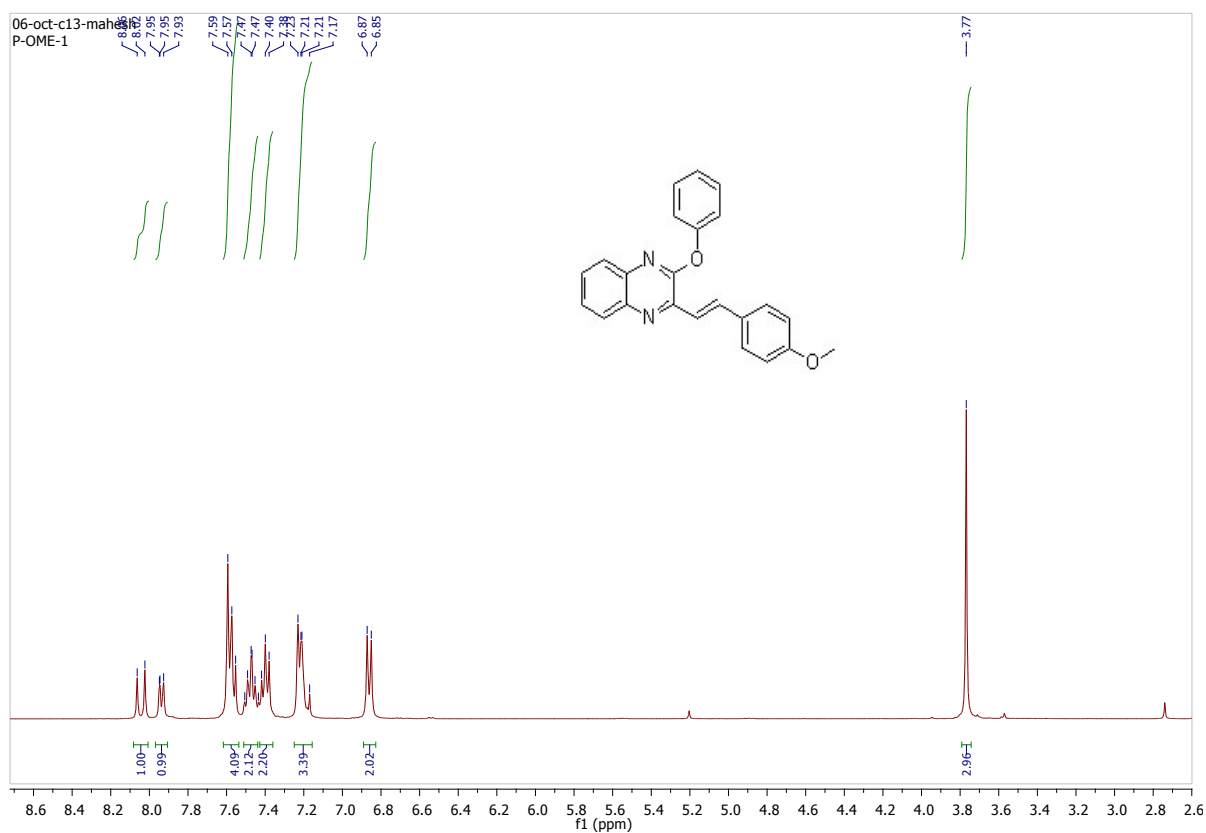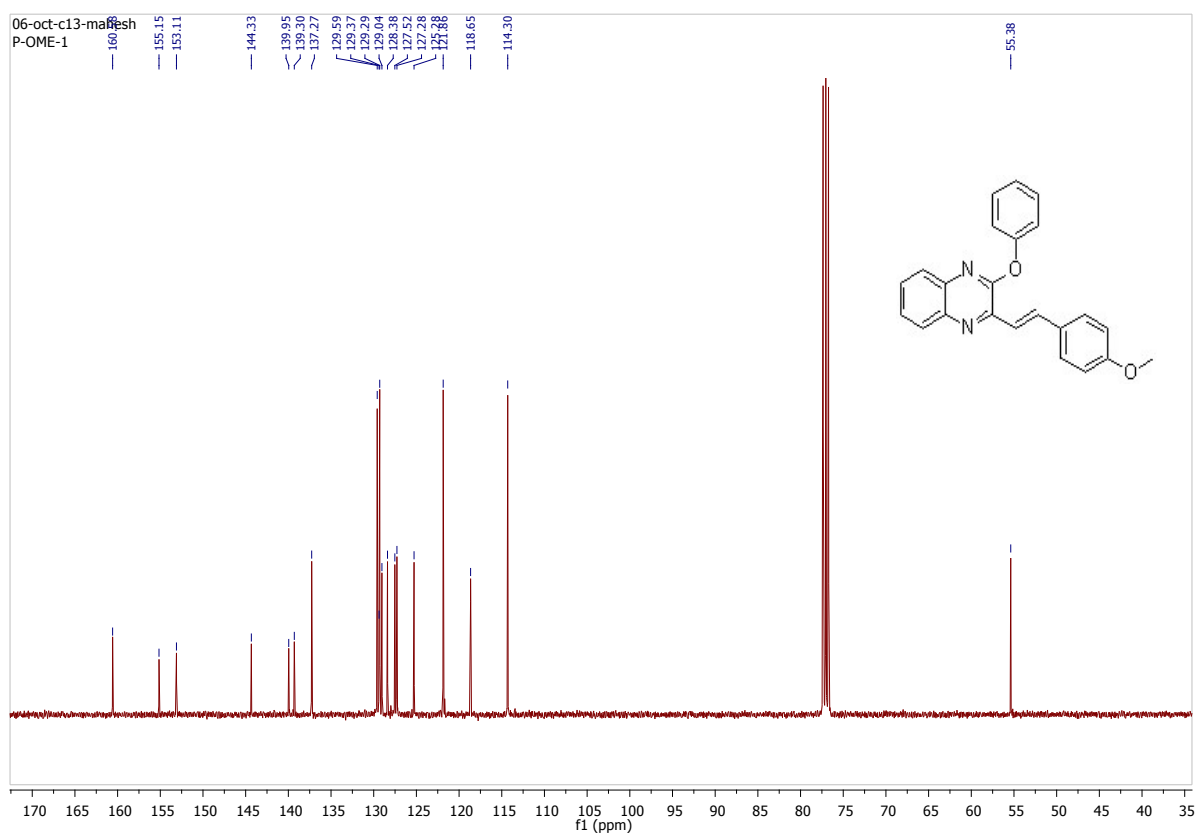

**$^1\text{H}$  &  $^{13}\text{C}$  NMR of (*E*)-3-(4-Methoxystyryl)-1-phenylquinoxalin-2(1*H*)-one(6a)**

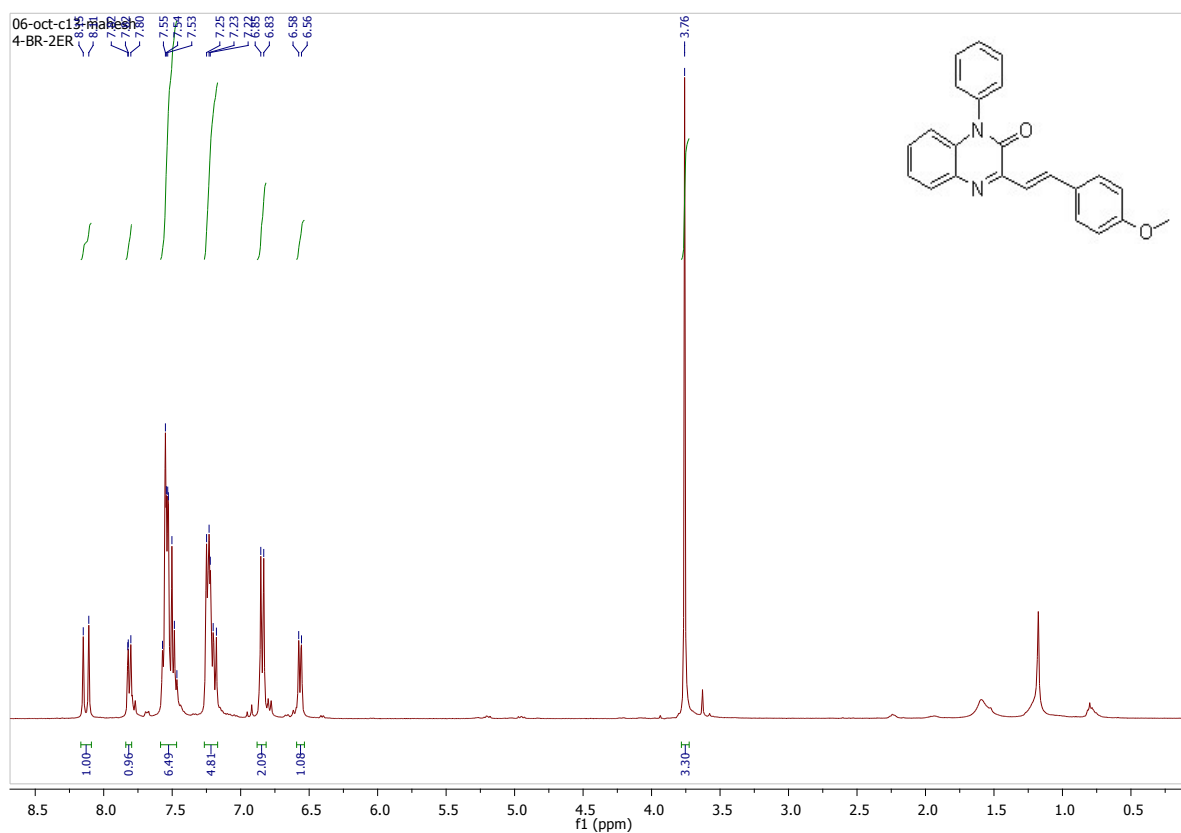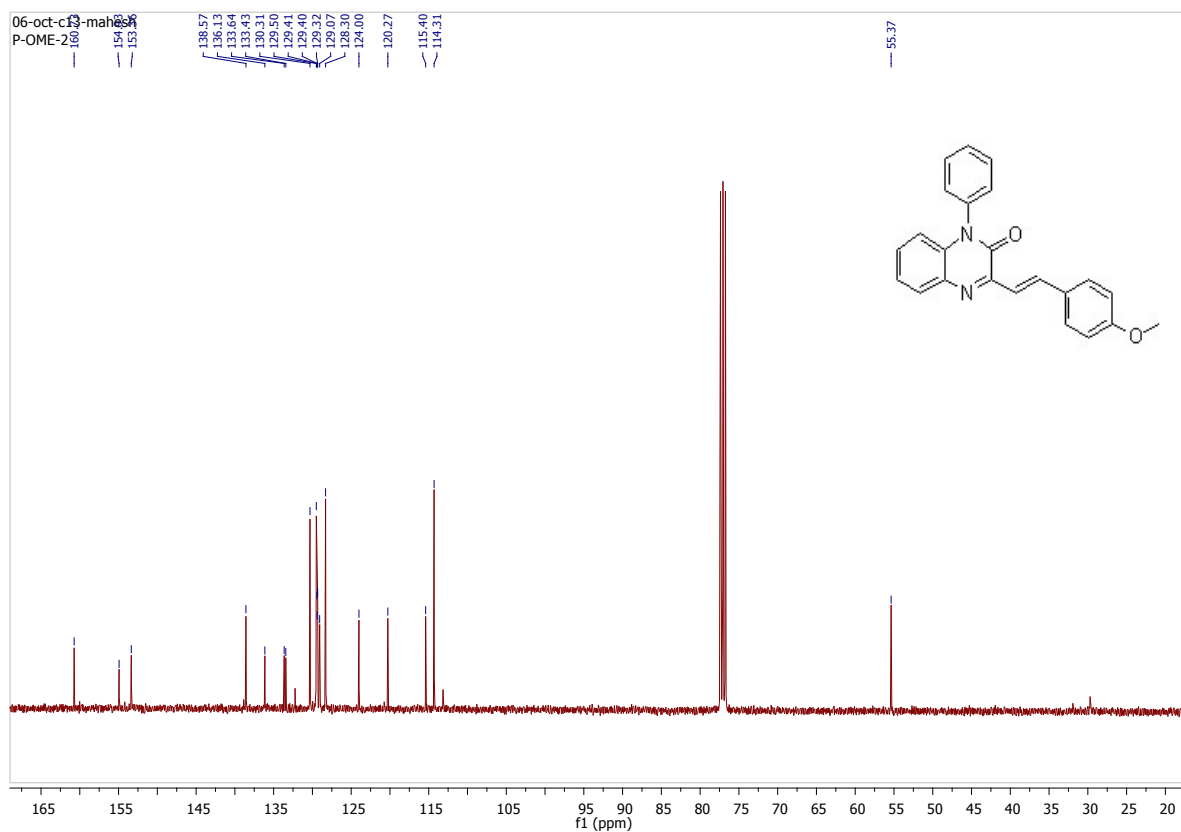



**$^1\text{H}$  &  $^{13}\text{C}$  NMR of (*E*)-2-Phenoxy-3-(3,4,5-trimethoxystyryl)quinoxaline(5b)**

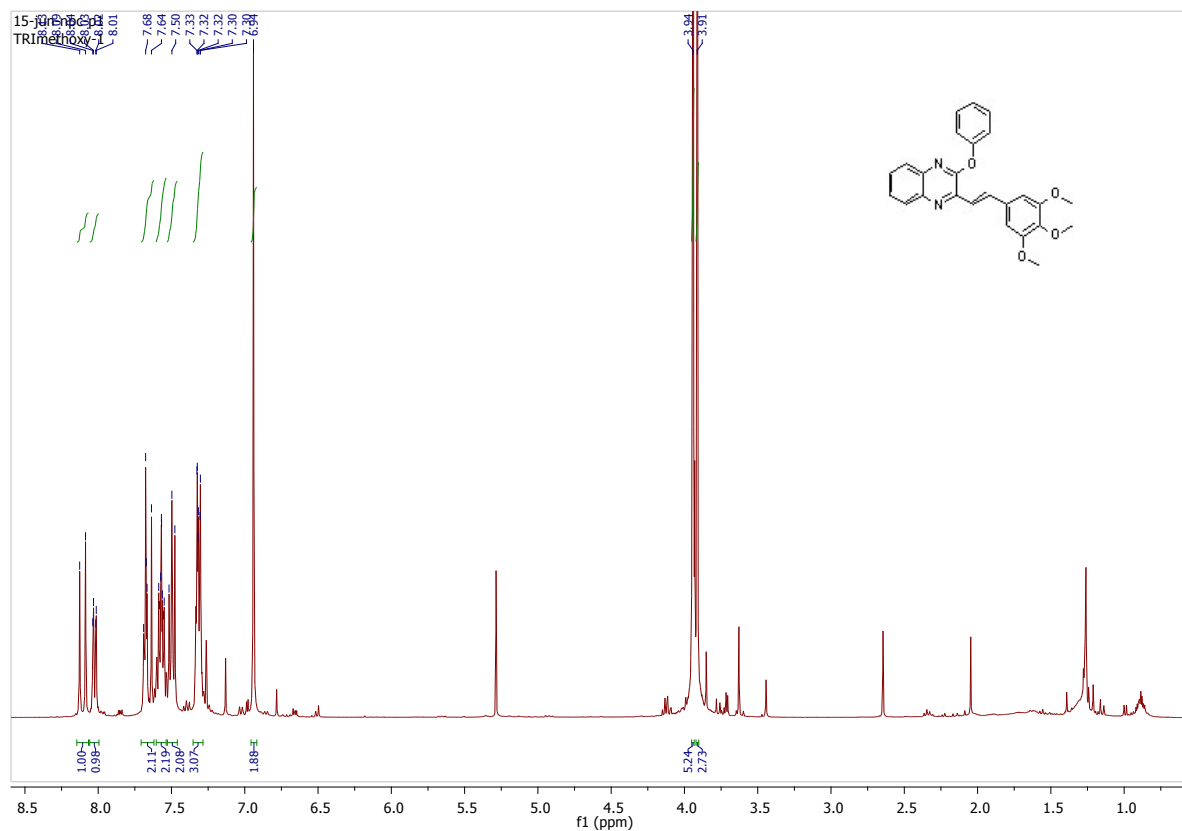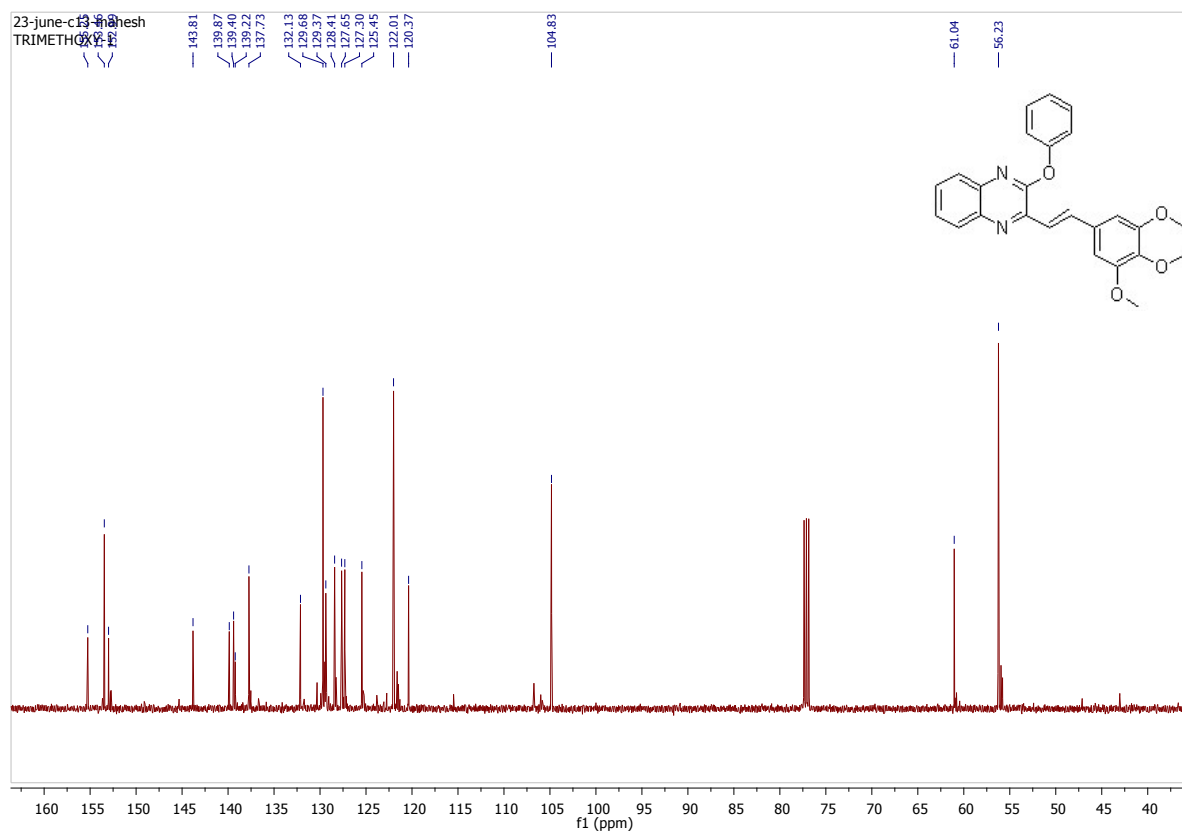

**$^1\text{H}$  &  $^{13}\text{C}$  NMR of (*E*)-1-Phenyl-3-(3,4,5-trimethoxystyryl)quinoxalin-2(1*H*)-one(6b)**

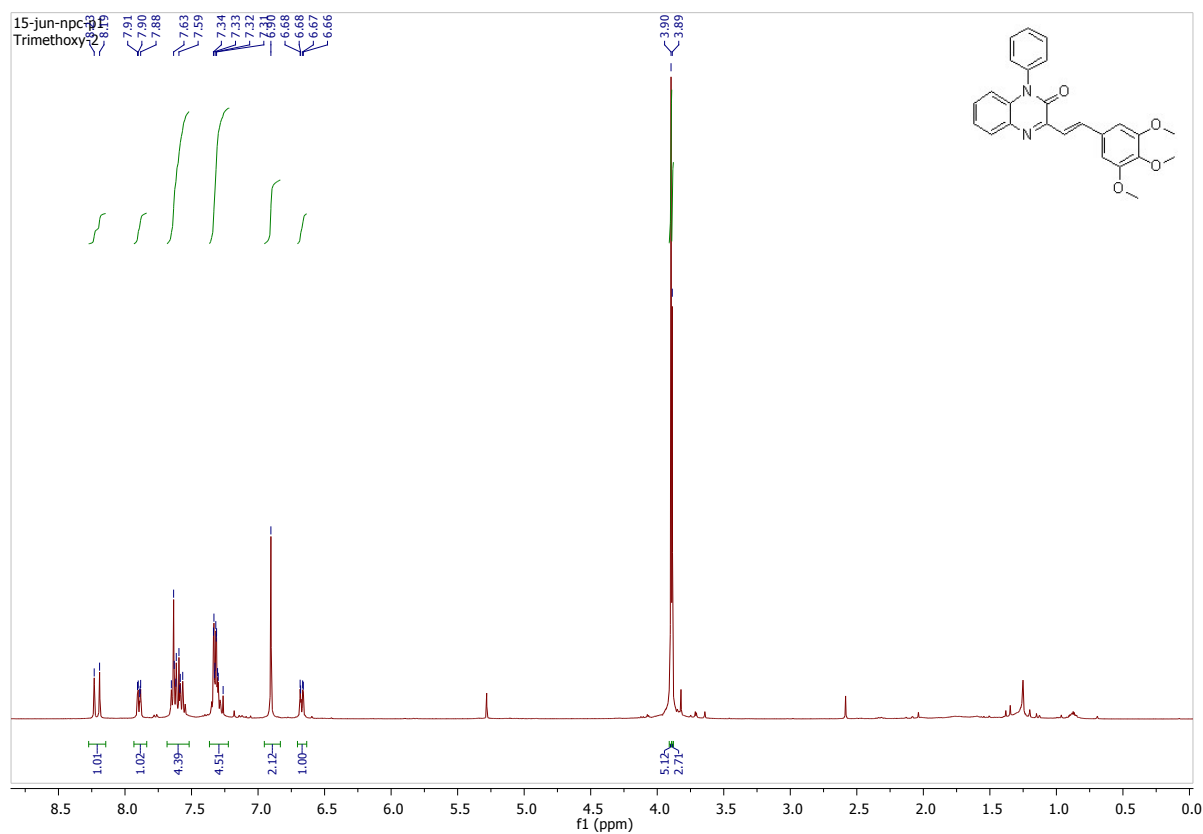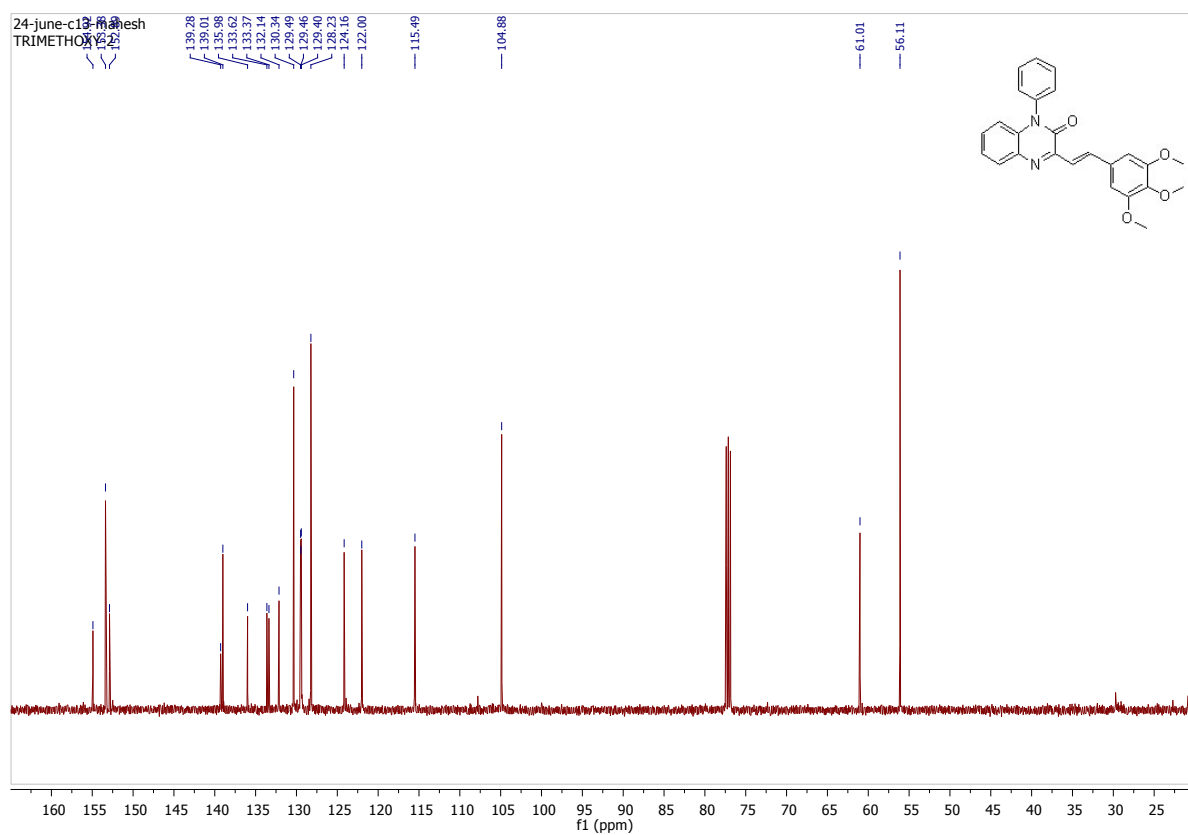

**$^1\text{H}$  &  $^{13}\text{C}$  NMR of 2-((E)-2-(Benzo[d][1,3]dioxol-5-yl)vinyl)-3-phenoxyquinoline(5c)**

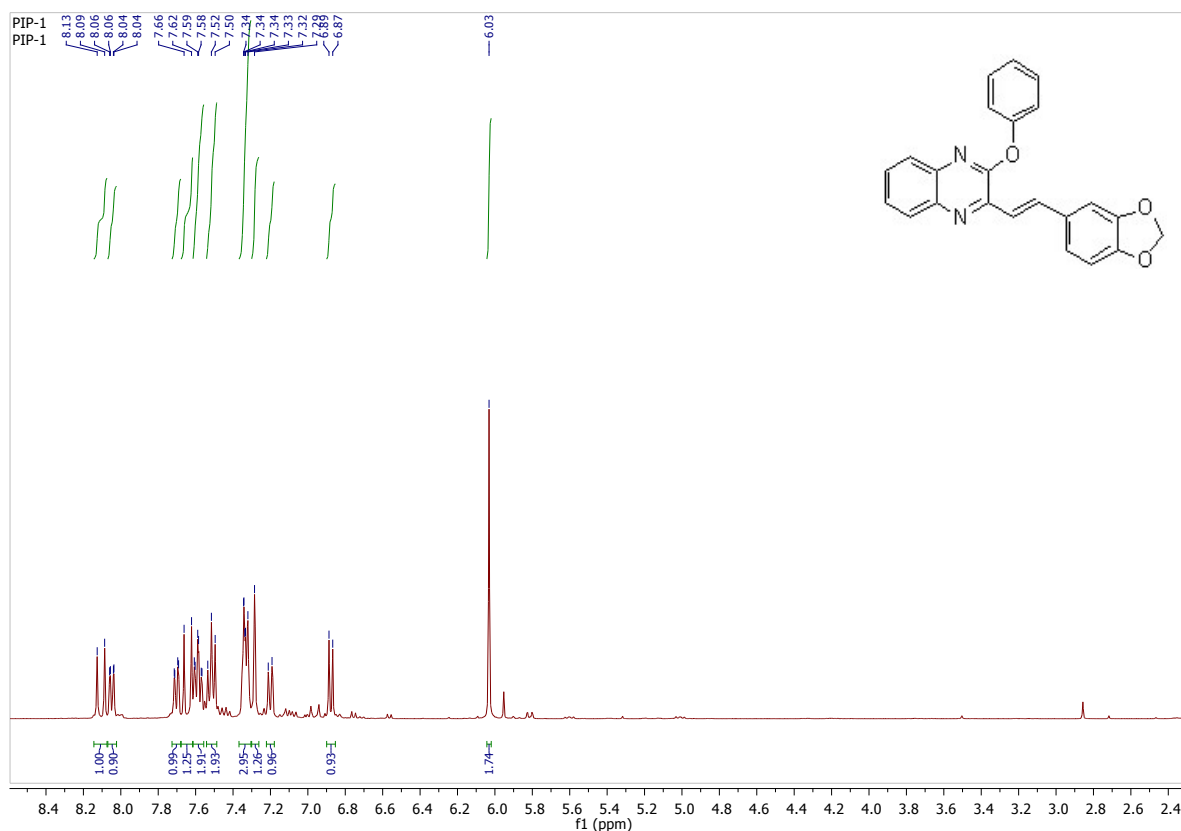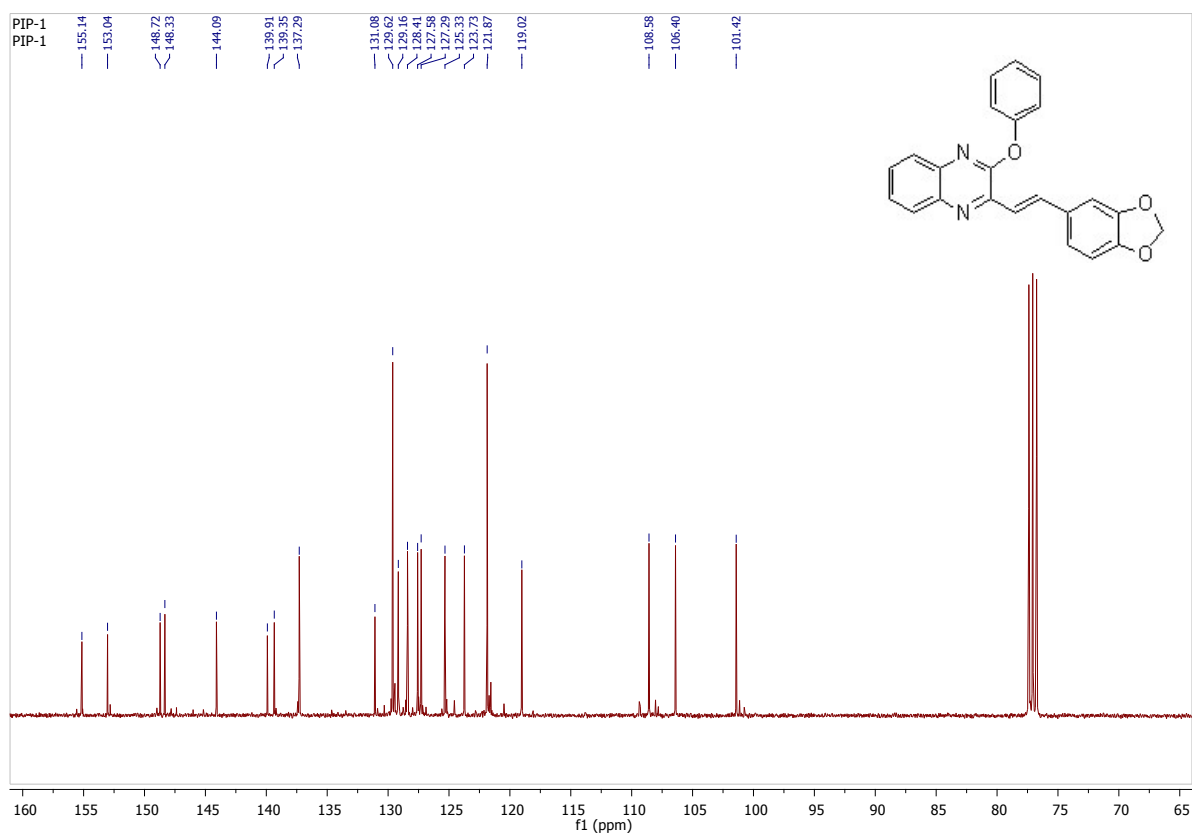

**$^1\text{H}$  &  $^{13}\text{C}$  NMR of (*E*)-3-(2-(Benzo[d][1,3]dioxol-5-yl)vinyl)-1-phenylquinoxalin-2(1*H*)-one(6c)**

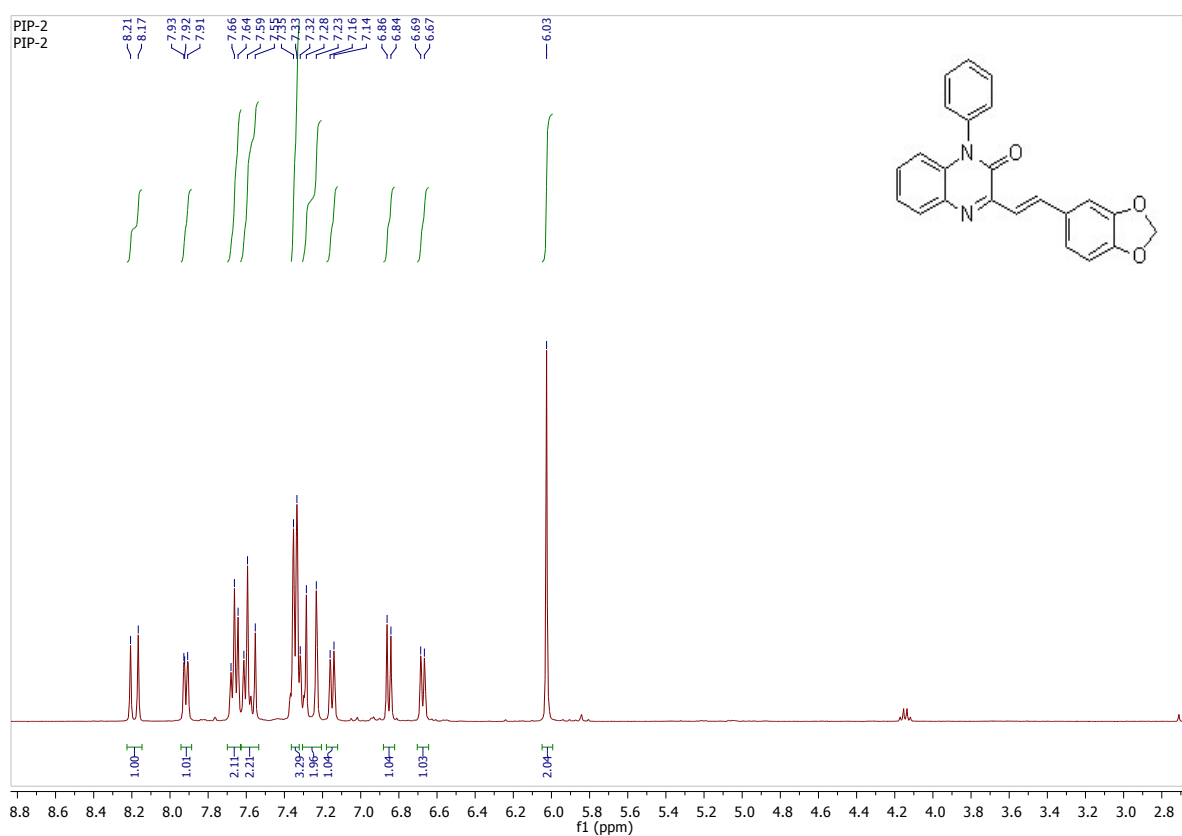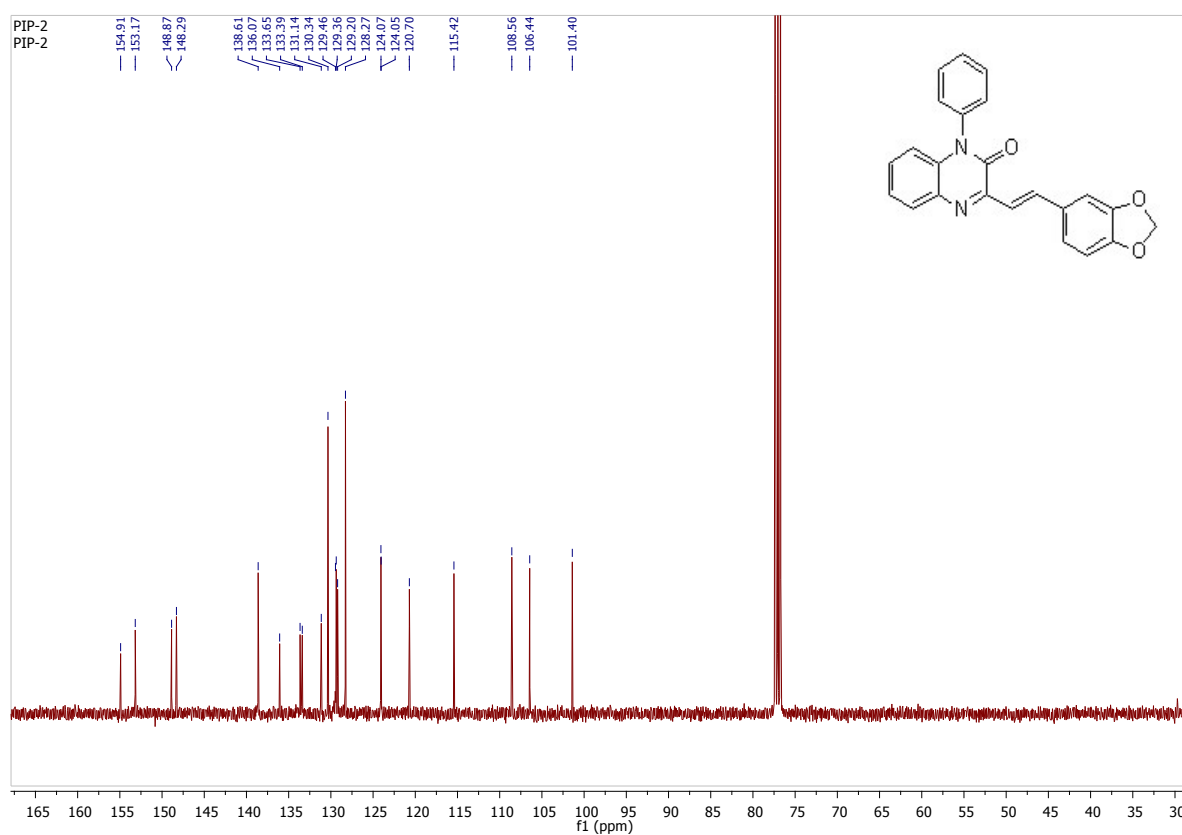

**$^1\text{H}$  &  $^{13}\text{C}$  NMR of (*E*)-2-Phenoxy-3-(4-(trifluoromethyl)styryl)quinoxaline(5d)**

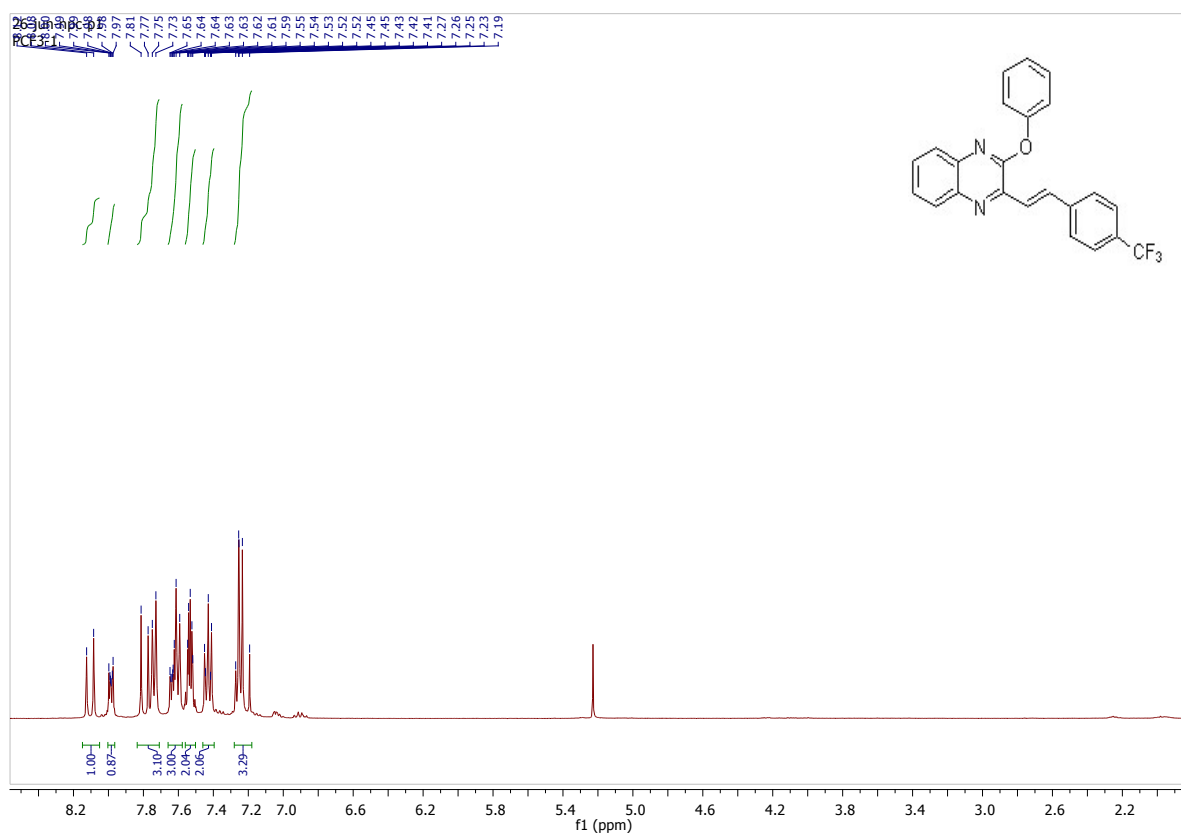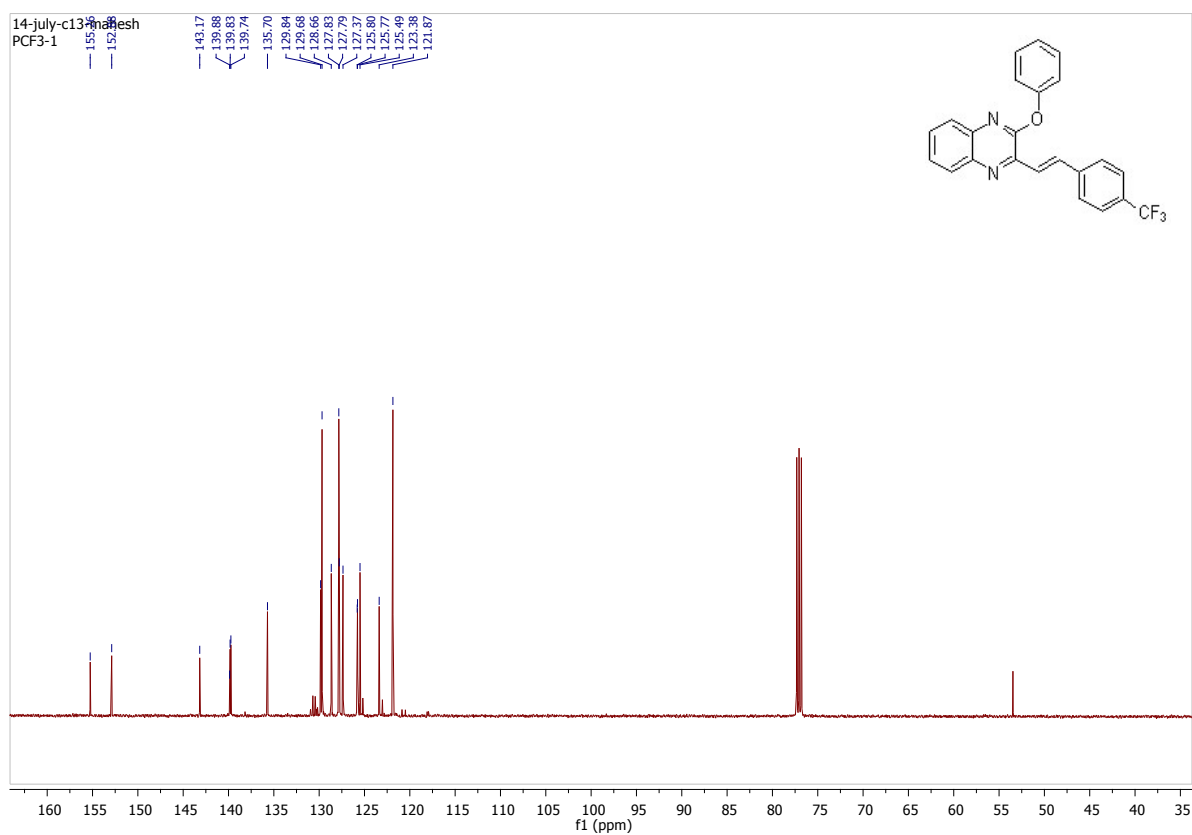

**$^1\text{H}$  &  $^{13}\text{C}$  NMR of (*E*)-1-Phenyl-3-(4-(trifluoromethyl)styryl)quinoxalin-2(1*H*)-one(6d)**

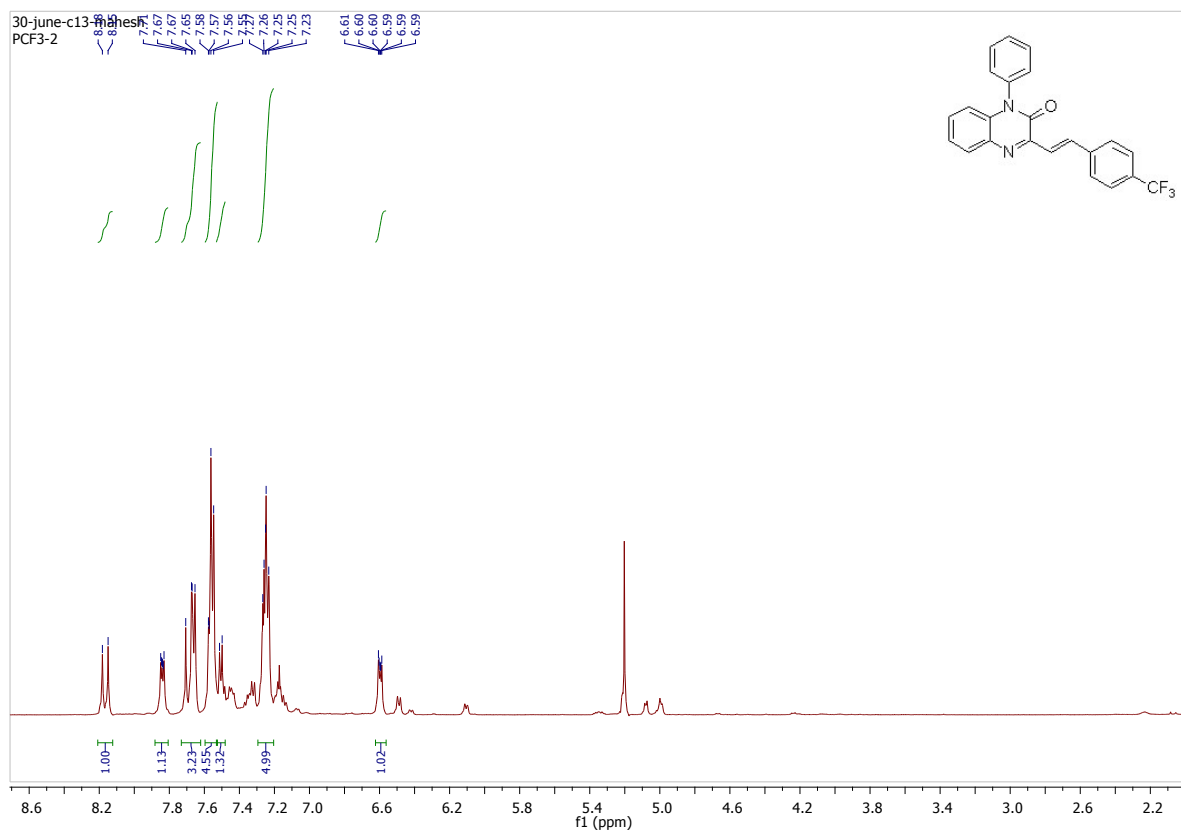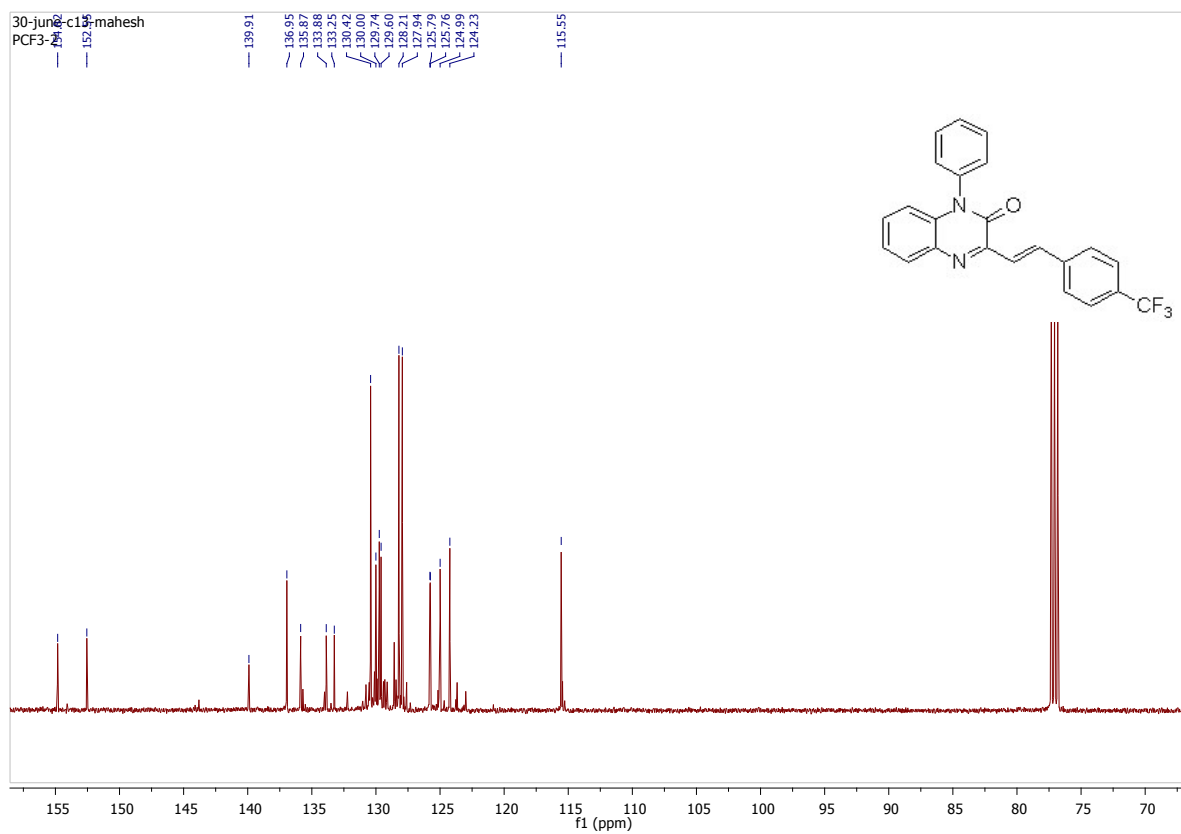

# <sup>1</sup>H & <sup>13</sup>C NMR of (*E*)-2-(2-Chlorostyryl)-3-phenoxyquinoxaline(5e)

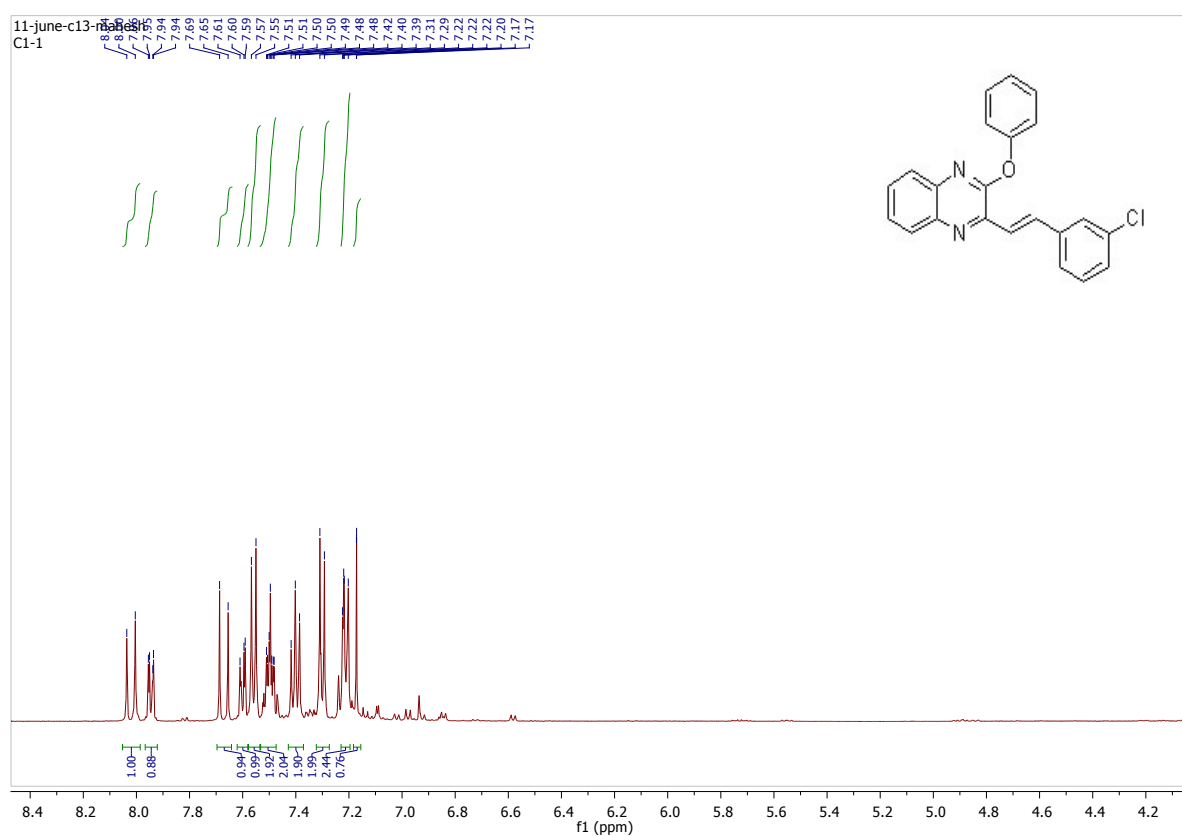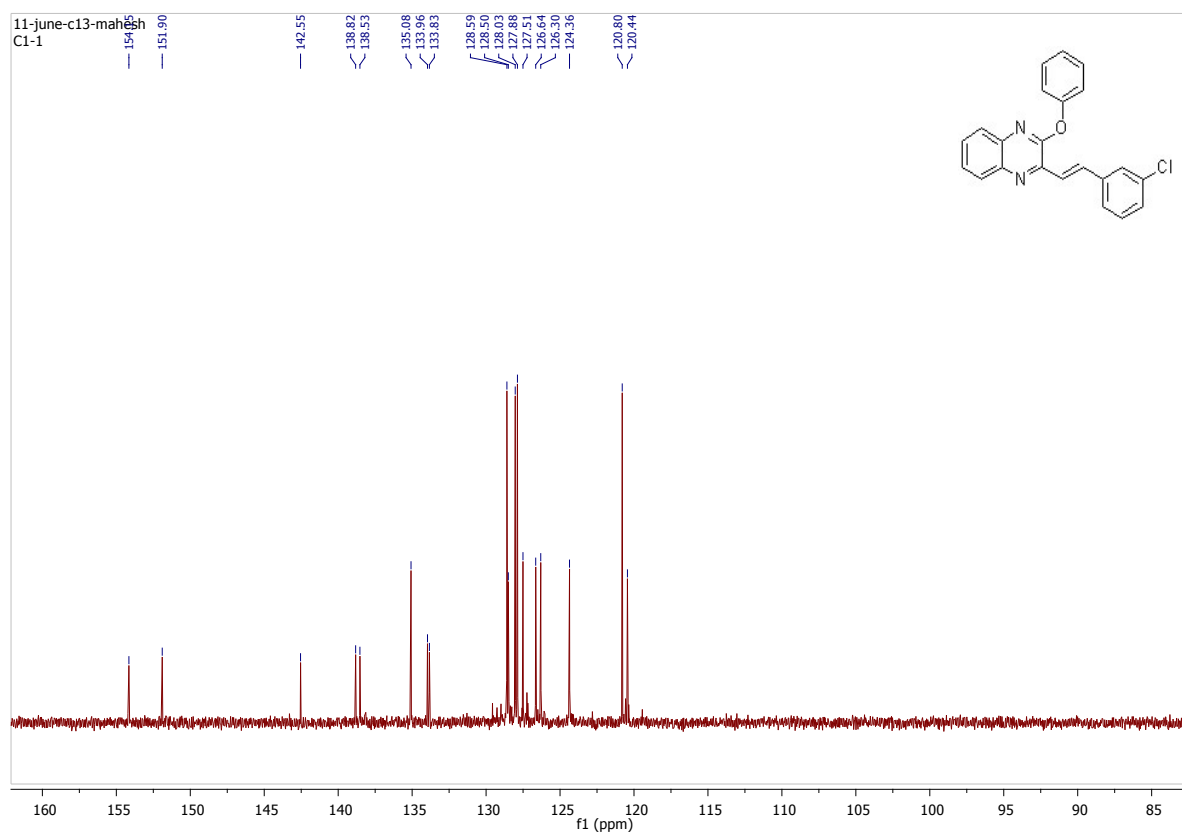

**<sup>1</sup>H & <sup>13</sup>C NMR of (*E*)-3-(2-Chlorostyryl)-1-phenylquinoxalin-2(1*H*)-one(6e)**

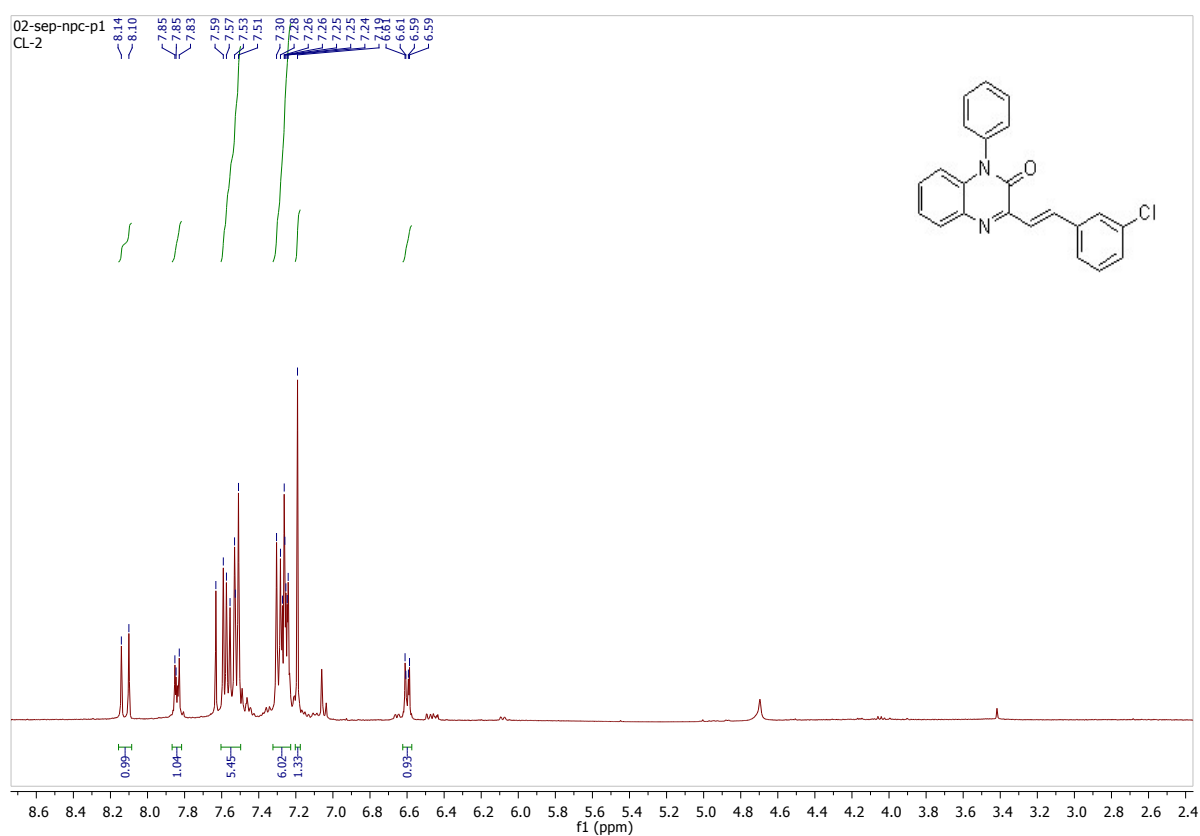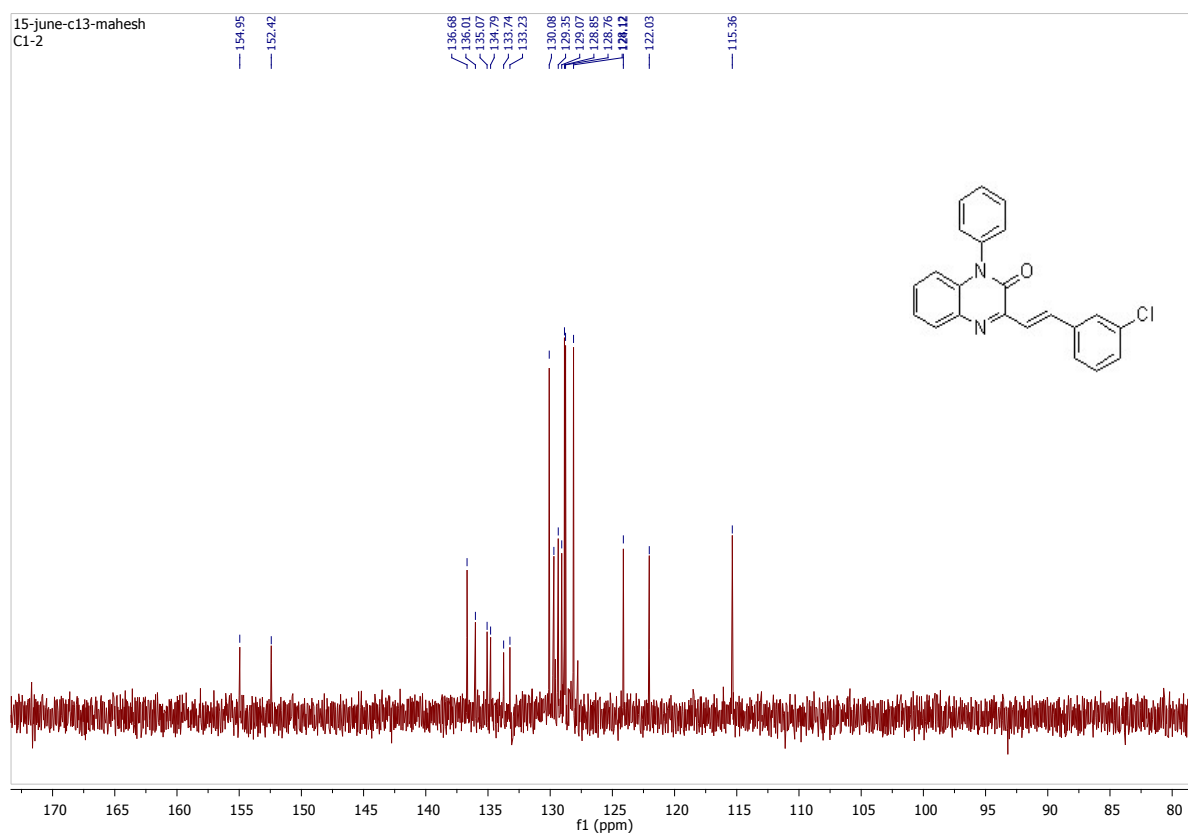



# **<sup>1</sup>H & <sup>13</sup>C NMR of 2-Phenoxy-6-phenyl-4-(3,4,5-trimethoxyphenyl)pyridine (8a)**

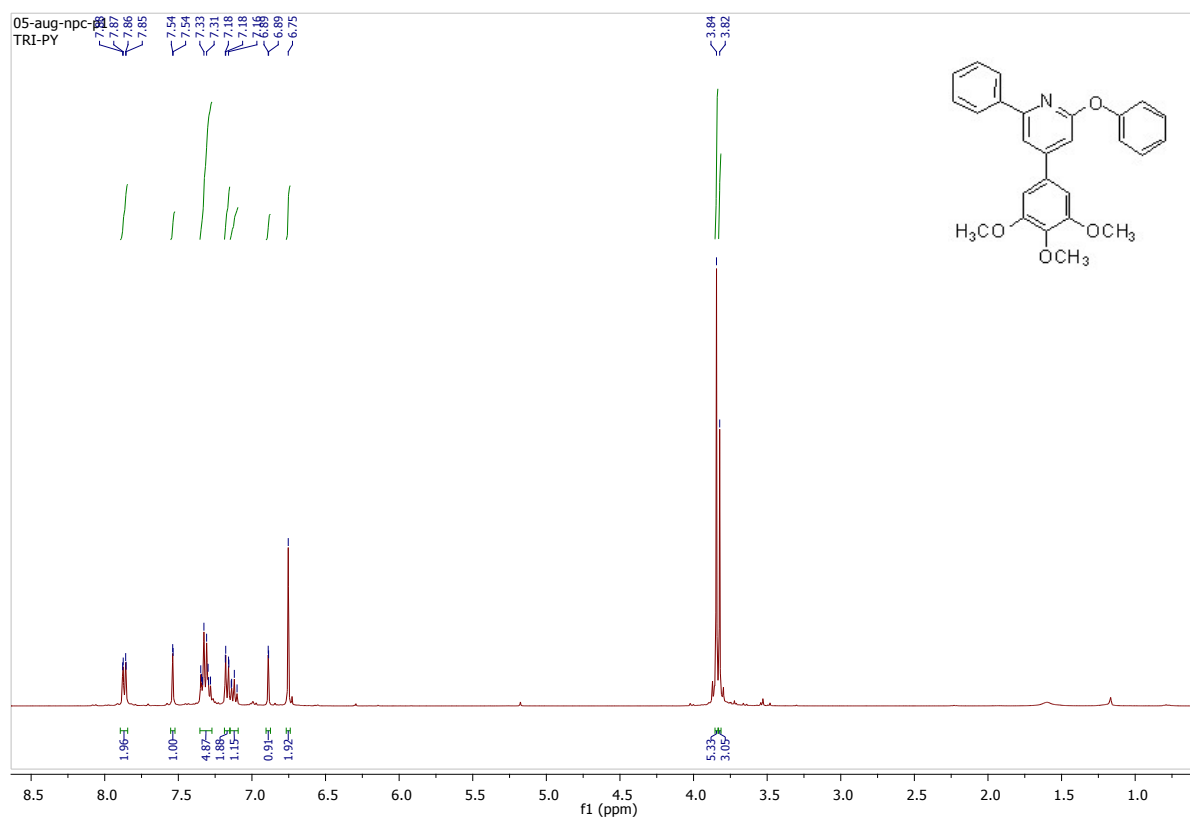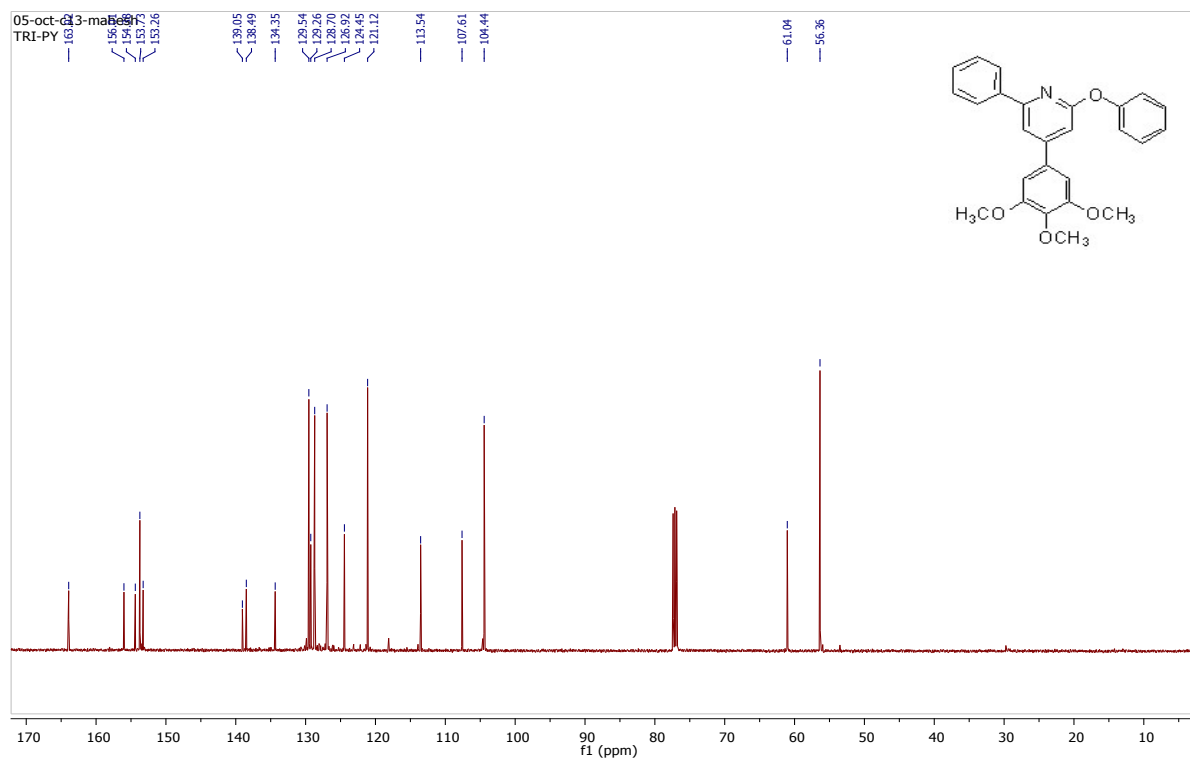

**$^1\text{H}$  &  $^{13}\text{C}$  NMR of 2-(4-Methoxyphenyl)-6-phenoxy-4-(3,4,5-trimethoxyphenyl)pyridine(8b)**

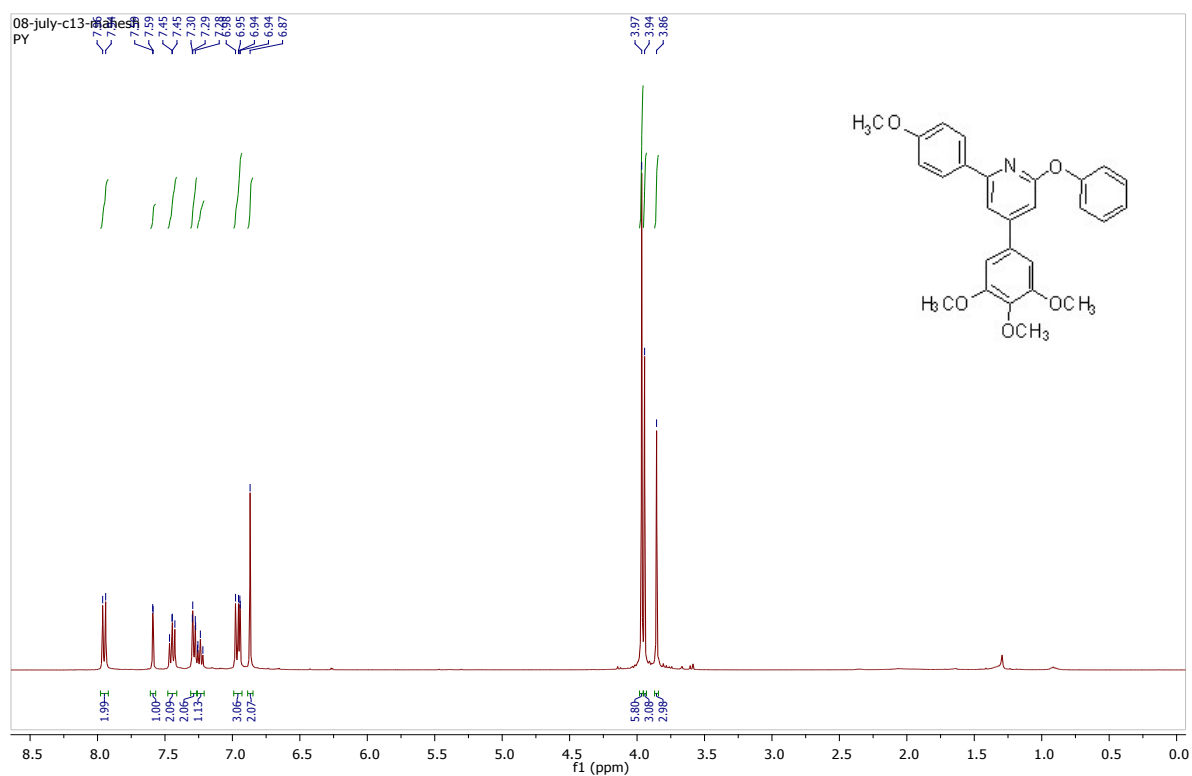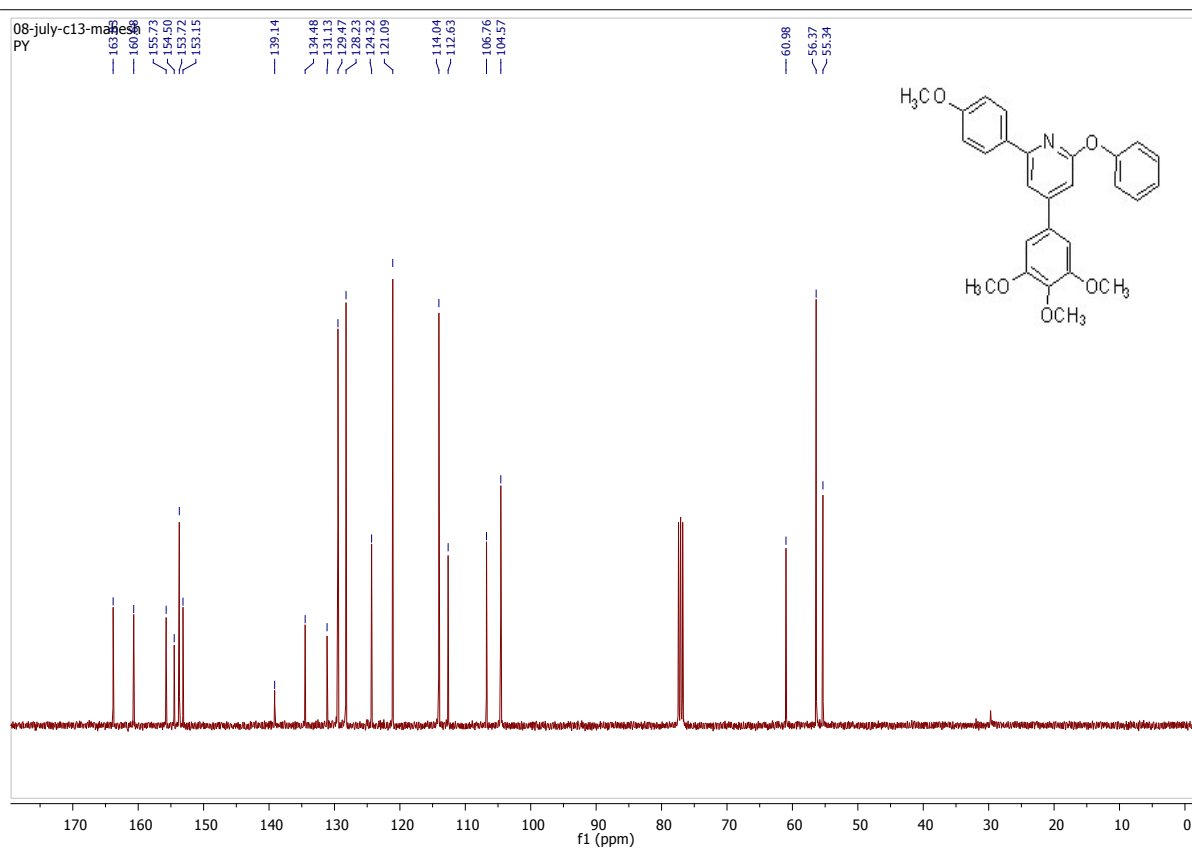

### <sup>1</sup>H & <sup>13</sup>C NMR of 4-(3-Nitrophenyl)-2-phenoxy-6-phenylpyridine(8c)

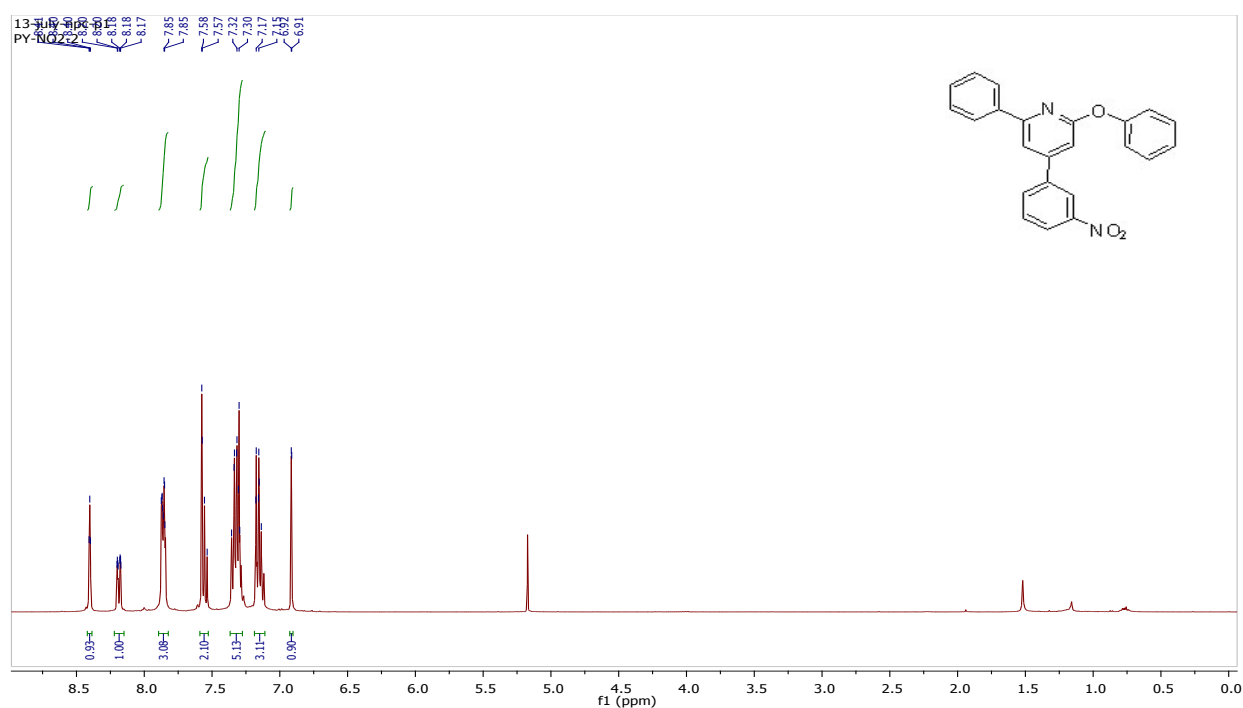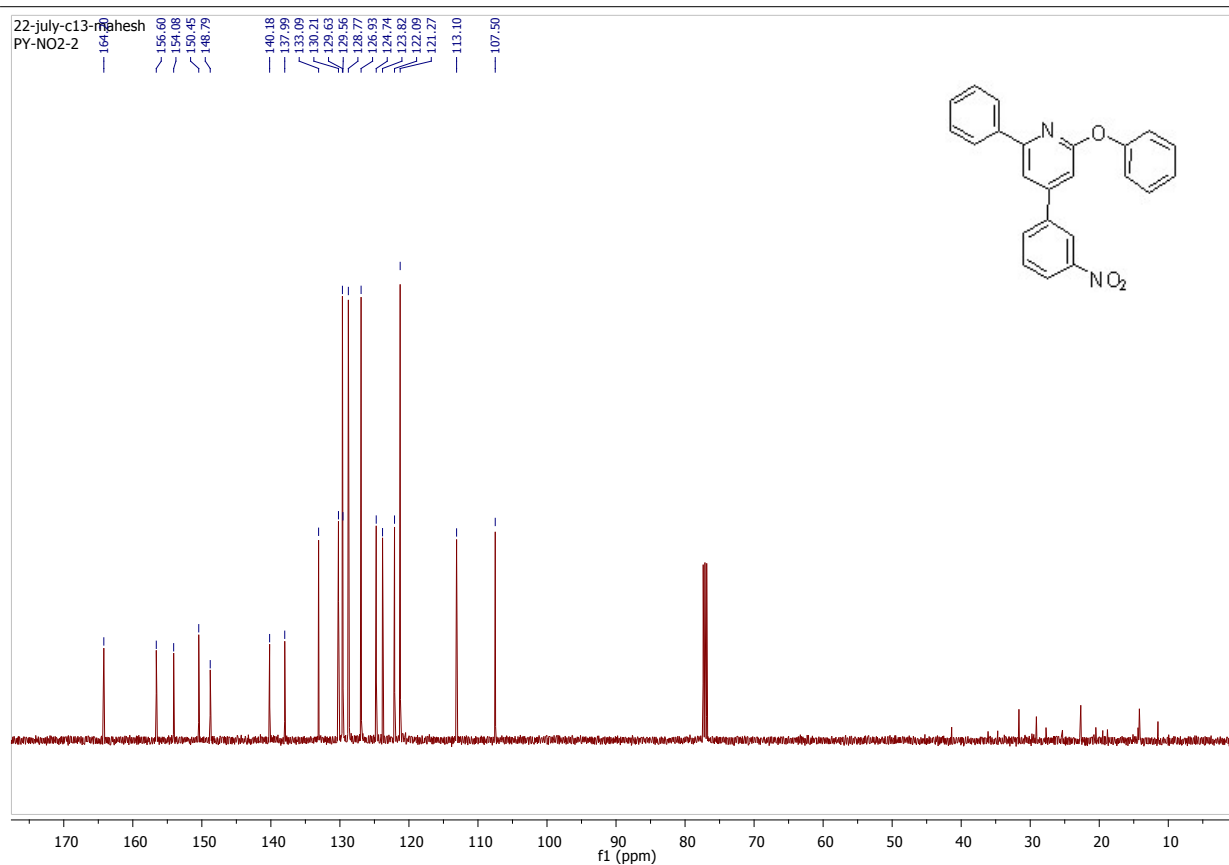

**$^1\text{H}$  &  $^{13}\text{C}$  NMR of 4-(4-Bromophenyl)-2-(4-chlorophenyl)-6-phenoxy pyridine (8d)**

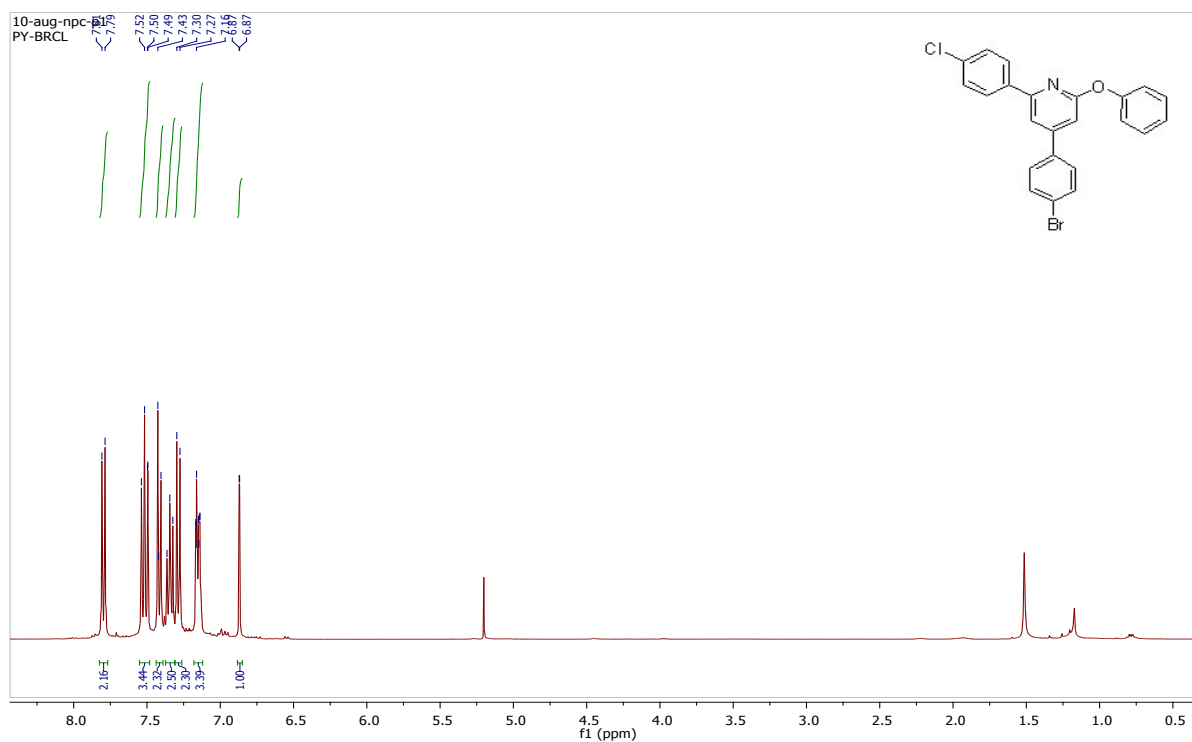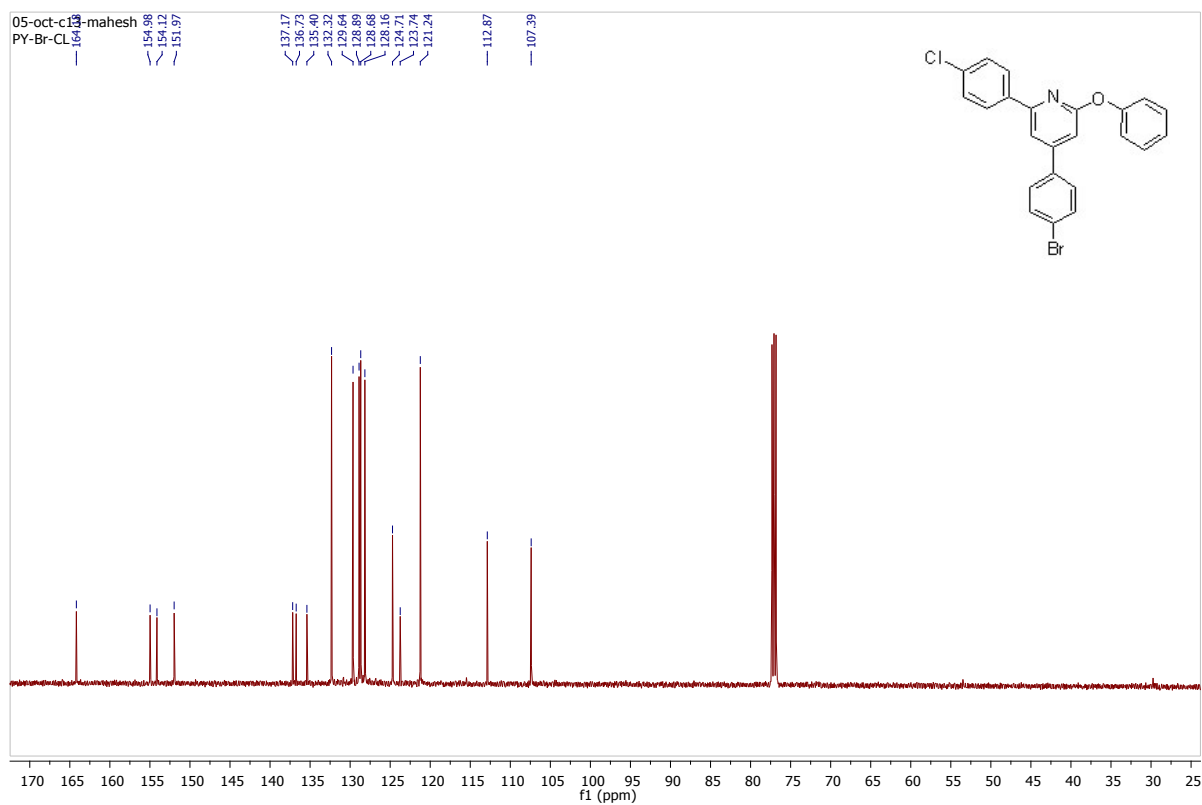

# <sup>1</sup>H & <sup>13</sup>C NMR of 6-Phenoxy-4-phenyl-2,2'-bipyridine(8e)

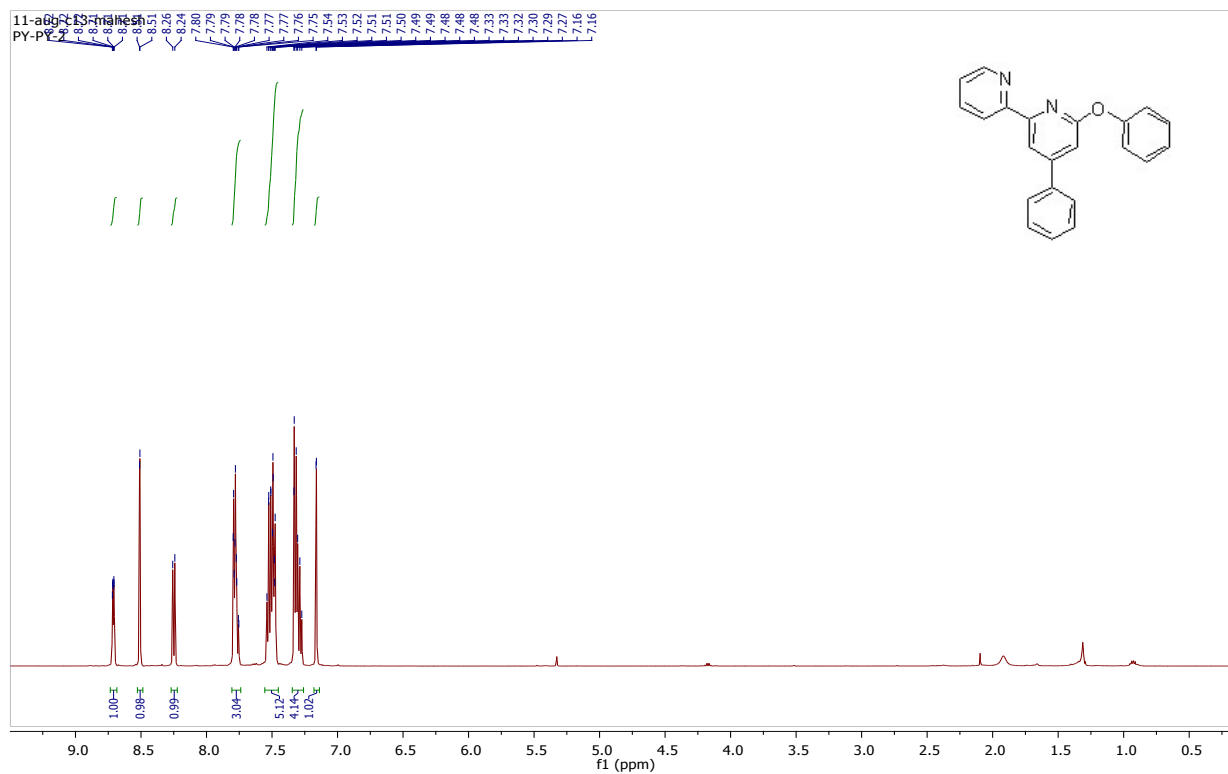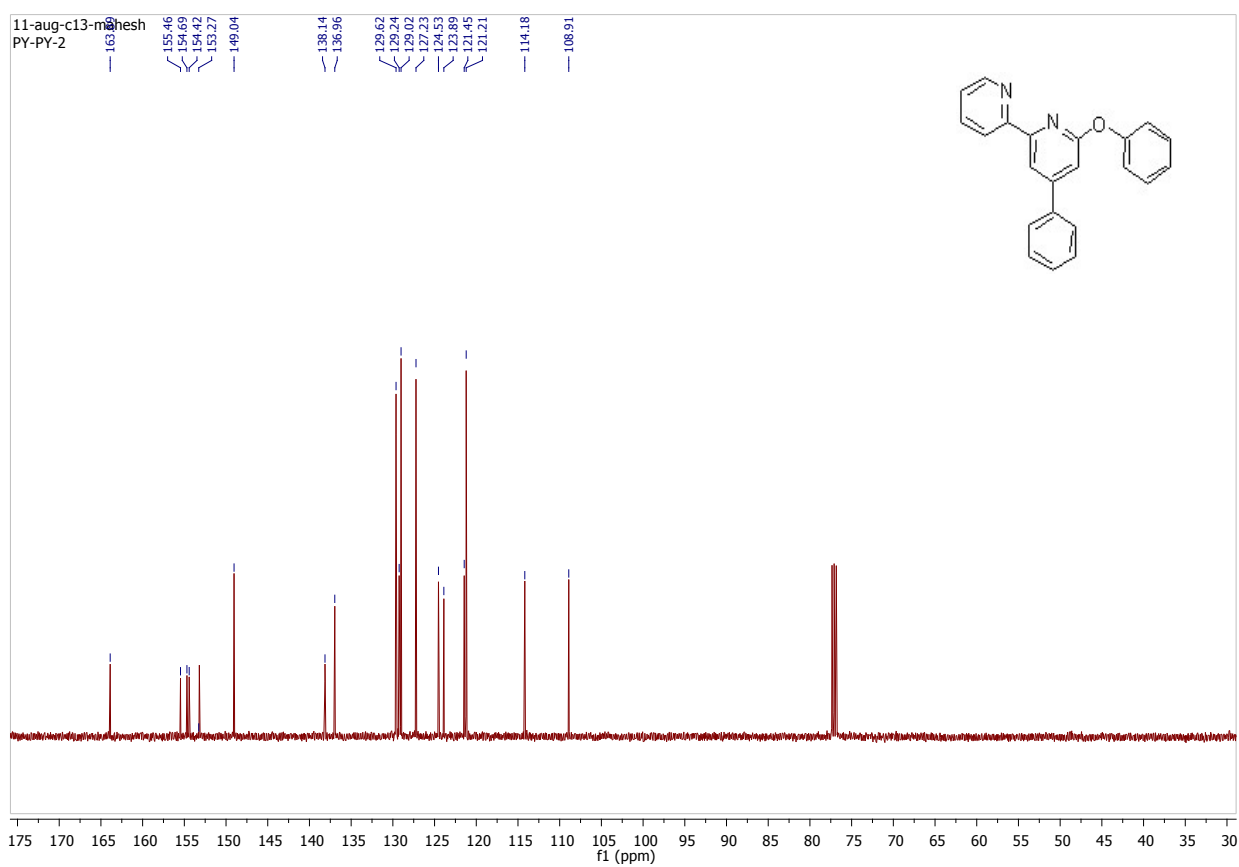

**$^1\text{H}$  &  $^{13}\text{C}$  NMR of 4-(Furan-2-yl)-2-phenoxy-6-phenylpyridine(8f)**

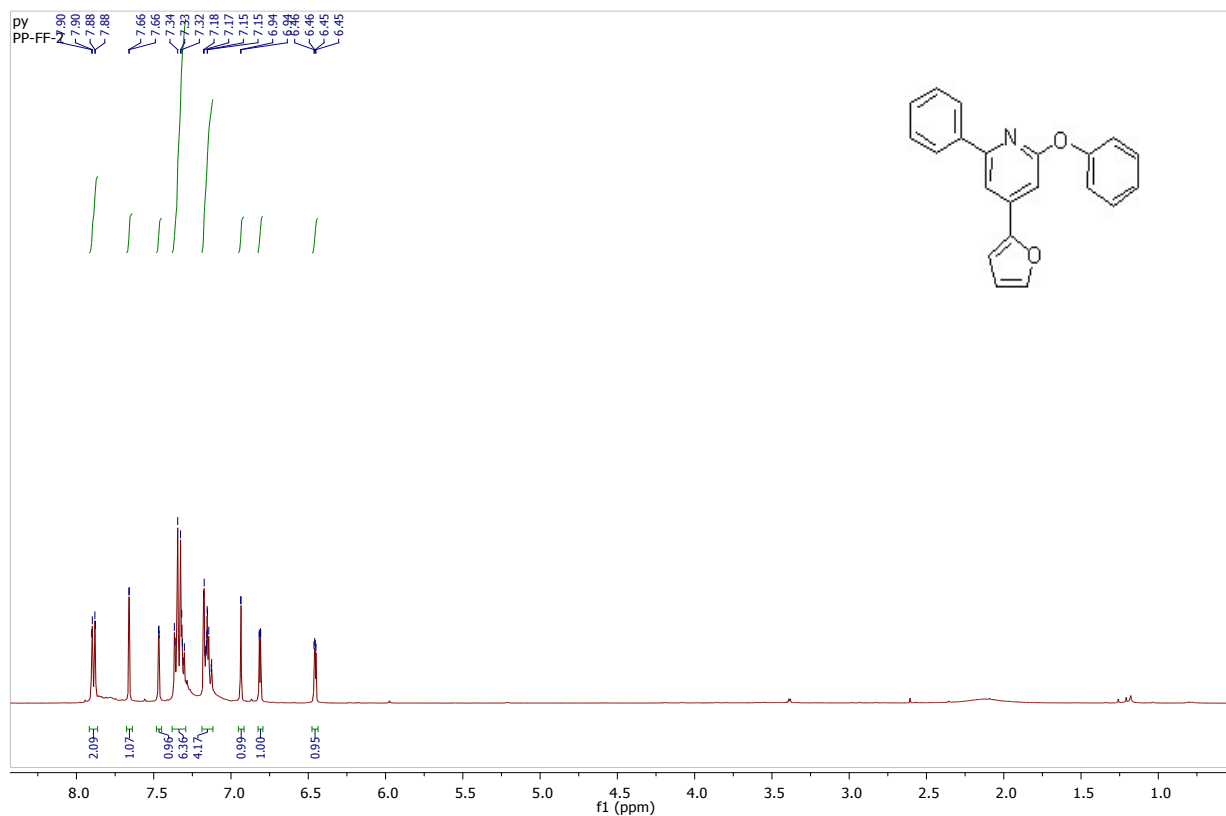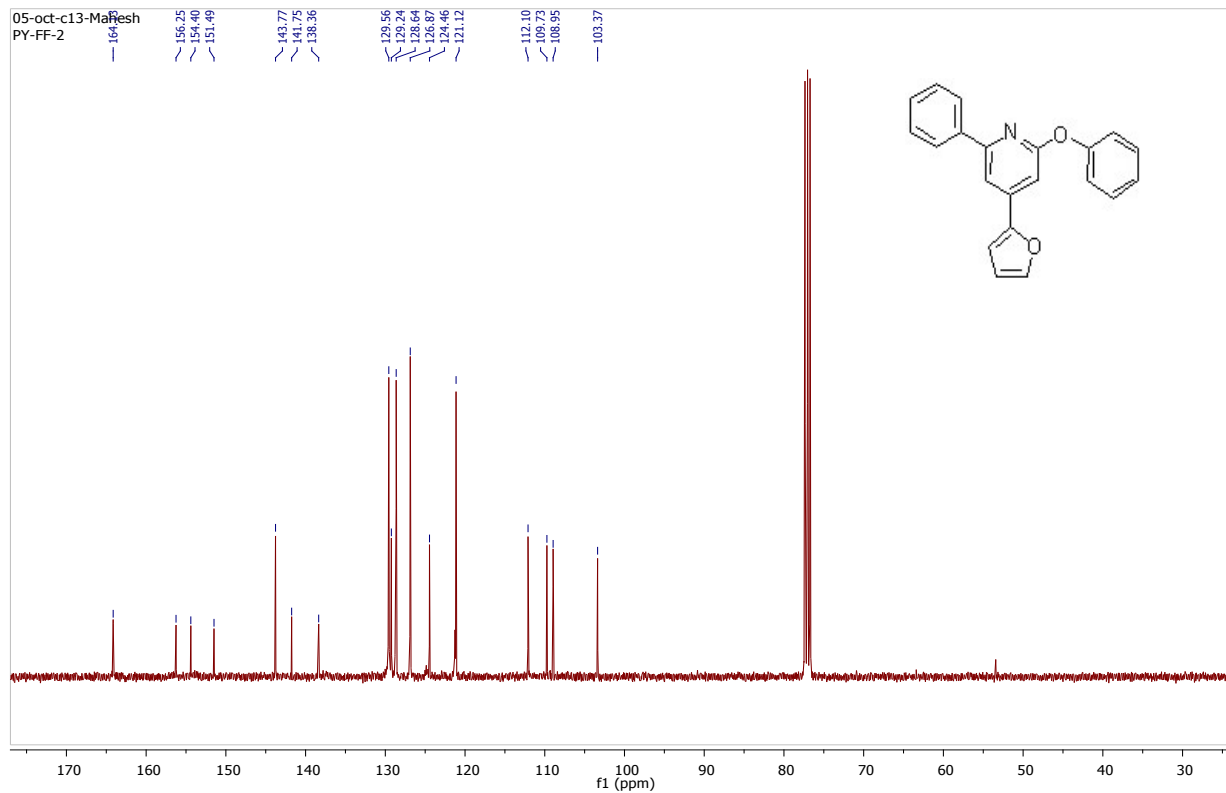

### X-ray crystallographic data of compound **8c**:

X-ray intensity data of 7234 reflections (of which 3530 unique) were collected on *X'calibur* CCD area-detector diffractometer equipped with graphite monochromated MoK $\alpha$  radiation ( $\lambda = 0.71073$  Å). The crystal used for data collection was of dimensions 0.30 x 0.20 x 0.20 mm. The cell dimensions were determined by least-squares fit of angular settings of 1788 reflections in the  $\theta$  range 3.93 to 27.57°. The intensities were measured by  $\omega$  scan mode for  $\theta$  ranges 3.53 to 26.00°. 2176 reflections were treated as observed ( $I > 2\sigma(I)$ ). Data were corrected for Lorentz, polarisation and absorption factors. The structure was solved by direct methods using SHELXS97 [1]. All non-hydrogen atoms of the molecule were located in the best E-map. Full-matrix least-squares refinement was carried out using SHELXL97 [1]. The final refinement cycles converged to an  $R = 0.0445$  and  $wR (F^2) = 0.0911$  for the observed data. Residual electron densities ranged from  $-0.126 < \Delta\rho < 0.158$  eÅ $^{-3}$ . Atomic scattering factors were taken from International Tables for X-ray Crystallography (1992, Vol. C, Tables 4.2.6.8 and 6.1.1.4). The crystallographic data are summarized in Table 1. An ORTEP view of the compound with atomic labelling is shown in Fig.1 [2]. The geometry of the molecule was calculated using the WinGX [3], PARST [4] and PLATON [5] software's. The compound 4-(3-Nitrophenyl)-2-phenoxy-6-phenylpyridine C $_{23}$ H $_{17}$ N $_2$ O $_3$  (**8c**), crystallizes in the monoclinic space group C2/c with the unit-cell parameters:  $a, b, c$  as 22.076 (2), 10.1079 (8), 16.921 (2) Å,  $\beta = 107.250$  (11)° and  $Z = 8$ . The crystal structure was solved by direct methods using single-crystal X-ray diffraction data collected at room temperature and refined by full-matrix least-squares procedures to a final R-value of 0.0445 for 2176 observed reflections.

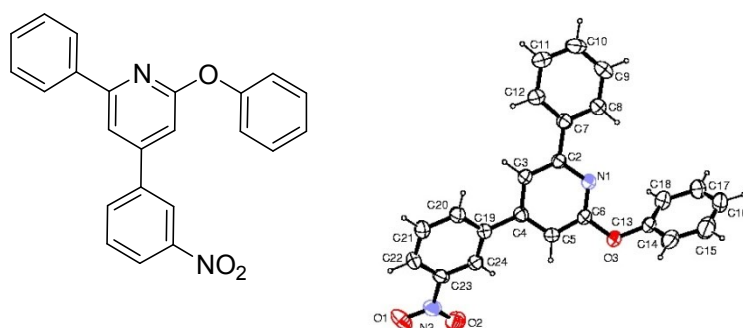

**Fig. 1:** ORTEP of (CCDC No. 1451640) compound **8c** which crystallized in monoclinic space group C2/c Unit Cell Parameters:  $a = 22.076$  (2) Å,  $b = 10.1079$  (8) Å,  $c = 16.921$  (2) Å for **8c**.

**Table S1:** Crystal and diffraction parameters of **8c**

|                                                                            |                                                                           |
|----------------------------------------------------------------------------|---------------------------------------------------------------------------|
| Chemical formula                                                           | C <sub>23</sub> H <sub>16</sub> N <sub>2</sub> O <sub>3</sub>             |
| $M_r$                                                                      | 368.38                                                                    |
| Crystal system, space group                                                | MONOCLINIC, $C2/c$                                                        |
| Temperature (K)                                                            | 293                                                                       |
| $a, b, c$ (Å)                                                              | 22.076 (2), 10.1079 (8), 16.921 (2)                                       |
| $\beta$ (°)                                                                | 107.250 (11)                                                              |
| $V$ (Å <sup>3</sup> )                                                      | 3605.9 (6)                                                                |
| $Z$                                                                        | 8                                                                         |
| $F(000)$                                                                   | 1536                                                                      |
| $D_x$ (Mg m <sup>-3</sup> )                                                | 1.357                                                                     |
| Radiation type                                                             | Mo $K\alpha$                                                              |
| No. of reflections for cell measurement                                    | 1788                                                                      |
| $\theta$ range (°) for cell measurement                                    | 3.9–27.6                                                                  |
| $\mu$ (mm <sup>-1</sup> )                                                  | 0.09                                                                      |
| Crystal shape                                                              | BLOCK                                                                     |
| Colour                                                                     | White                                                                     |
| Crystal size (mm)                                                          | 0.30 × 0.20 × 0.20                                                        |
| Scan method                                                                | $\omega$ scans                                                            |
| Absorption correction                                                      | Multi-scan                                                                |
| $T_{\min}, T_{\max}$                                                       | 0.893, 1.000                                                              |
| No. of measured, independent and observed [ $I > 2\sigma(I)$ ] reflections | 7234, 3530, 2176                                                          |
| $R_{\text{int}}$                                                           | 0.028                                                                     |
| $\theta$ values (°)                                                        | $\theta_{\max} = 26.0, \theta_{\min} = 3.5$                               |
| $(\sin \theta/\lambda)_{\max}$ (Å <sup>-1</sup> )                          | 0.617                                                                     |
| Range of $h, k, l$                                                         | $h = -27 \rightarrow 17, k = -12 \rightarrow 8, l = -20 \rightarrow 20$   |
| Refinement on                                                              | $F^2$                                                                     |
| $R[F^2 > 2\sigma(F^2)], wR(F^2), S$                                        | 0.0445, 0.1090, 0.993                                                     |
| No. of reflections                                                         | 3530                                                                      |
| No. of parameters                                                          | 254                                                                       |
| No. of restraints                                                          | 0                                                                         |
| H-atom treatment                                                           | H-atom parameters constrained                                             |
| Weighting scheme                                                           | $w = 1/[\sigma^2(F_o^2) + (0.0433P)^2]$<br>where $P = (F_o^2 + 2F_c^2)/3$ |
| $(\Delta/\sigma)_{\max}$                                                   | < 0.001                                                                   |
| $\Delta\rho_{\max}, \Delta\rho_{\min}$ (e Å <sup>-3</sup> )                | 0.16, -0.13                                                               |

**X-ray crystallographic data of compound 8e:**

X-ray intensity data of 5807 reflections (of which 3223 unique) were collected on *X'calibur* CCD area-detector diffractometer equipped with graphite monochromated MoK $\alpha$  radiation ( $\lambda = 0.71073$  Å). The crystal used for data collection was of dimensions 0.30 x 0.20 x 0.20



mm. The cell dimensions were determined by least-squares fit of angular settings of 1471 reflections in the  $\theta$  range 4.12 to 26.09°. The intensities were measured by  $\omega$  scan mode for  $\theta$  ranges 3.52 to 26.00°. 1919 reflections were treated as observed ( $I > 2\sigma(I)$ ). Data were corrected for Lorentz, polarisation and absorption factors. The structure was solved by direct methods using SHELXS97.<sup>23</sup> All non-hydrogen atoms of the molecule were located in the best E-map. Full-matrix least-squares refinement was carried out using SHELXL97.<sup>23</sup> The final refinement cycles converged to an  $R = 0.0533$  and  $wR(F^2) = 0.1235$  for the observed data. Residual electron densities ranged from  $-0.162 < \Delta\rho < 0.172 \text{ e\AA}^{-3}$ . Atomic scattering factors were taken from International Tables for X-ray Crystallography (1992, Vol. C, Tables 4.2.6.8 and 6.1.1.4). The crystallographic data are summarized in Table 2. Compound 6-phenoxy-4-phenyl-2, 2'-bipyridine  $\text{C}_{22}\text{H}_{16}\text{N}_2\text{O}$  (**8e**), crystallizes in the triclinic space group  $P-1$  with the unit-cell parameters:  $a, b, c, \alpha, \beta, \gamma$  as 8.1694 (12), 9.7524 (16), 11.8980 (18) Å, 73.012 (14), 75.211 (13), 67.352 (15)° and  $Z = 2$ . The crystal structures **8e** was solved by direct methods using single-crystal X-ray diffraction data collected at room temperature and refined by full-matrix least-squares procedures to final R-values of 0.0579 for 1636 observed reflections and 0.0533 for 1919 observed reflections respectively.

#### Crystal structure of 6-phenoxy-4-phenyl-2, 2'-bipyridine (**8e**)

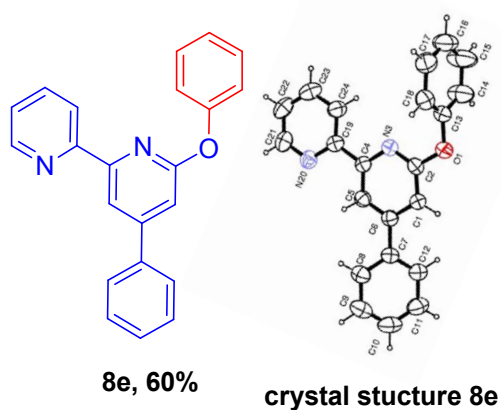

**Fig. 2:** ORTEP of (CCDC No. 1451639) compound **8e** which crystallized in triclinic space group  $P-1$  Unit Cell Parameters:  $a = 8.1694 (12) \text{ \AA}$ ,  $b = 9.7524 (16) \text{ \AA}$ ,  $c = 11.8980 (18) \text{ \AA}$ .

**Table S2:** Crystal and diffraction parameters of **8e**.

|                                                                            |                                                                                    |
|----------------------------------------------------------------------------|------------------------------------------------------------------------------------|
| Chemical formula                                                           | C <sub>22</sub> H <sub>16</sub> N <sub>2</sub> O                                   |
| $M_r$                                                                      | 324.37                                                                             |
| Crystal system, space group                                                | TRICLINIC, $P1$                                                                    |
| Temperature (K)                                                            | 293                                                                                |
| $a, b, c$ (Å)                                                              | 8.1694 (12), 9.7524 (16), 11.8980 (18)                                             |
| $\alpha, \beta, \gamma$ (°)                                                | 73.012 (14), 75.211 (13), 67.352 (15)                                              |
| $V$ (Å <sup>3</sup> )                                                      | 825.6 (2)                                                                          |
| $Z$                                                                        | 2                                                                                  |
| $F(000)$                                                                   | 340                                                                                |
| $D_x$ (Mg m <sup>-3</sup> )                                                | 1.305                                                                              |
| Radiation type                                                             | Mo $K\alpha$                                                                       |
| No. of reflections for cell measurement                                    | 1471                                                                               |
| $\theta$ range (°) for cell measurement                                    | 4.1–26.1                                                                           |
| $\mu$ (mm <sup>-1</sup> )                                                  | 0.08                                                                               |
| Crystal shape                                                              | BLOCK                                                                              |
| Colour                                                                     | White                                                                              |
| Crystal size (mm)                                                          | 0.30 × 0.20 × 0.20                                                                 |
| Diffractometer                                                             | Xcalibur, Sapphire3 diffractometer                                                 |
| Scan method                                                                | $\omega$ Scan scans                                                                |
| Absorption correction                                                      | Multi-scan                                                                         |
| $T_{\min}, T_{\max}$                                                       | 0.868, 1.000                                                                       |
| No. of measured, independent and observed [ $I > 2\sigma(I)$ ] reflections | 5807, 3223, 1919                                                                   |
| $R_{\text{int}}$                                                           | 0.028                                                                              |
| $\theta$ values (°)                                                        | $\theta_{\max} = 26.0, \theta_{\min} = 3.5$                                        |
| $(\sin \theta/\lambda)_{\max}$ (Å <sup>-1</sup> )                          | 0.617                                                                              |
| Range of $h, k, l$                                                         | $h = -10 \rightarrow 10, k = -12 \rightarrow 5, l = -14 \rightarrow 14$            |
| Refinement on                                                              | $F^2$                                                                              |
| $R[F^2 > 2\sigma(F^2)], wR(F^2), S$                                        | 0.0533, 0.1519, 1.042                                                              |
| No. of reflections                                                         | 3223                                                                               |
| No. of parameters                                                          | 227                                                                                |
| No. of restraints                                                          | 0                                                                                  |
| H-atom treatment                                                           | H-atom parameters constrained                                                      |
| Weighting scheme                                                           | $w = 1/[\sigma^2(F_o^2) + (0.058P)^2 + 0.0032P]$<br>where $P = (F_o^2 + 2F_c^2)/3$ |
| $(\Delta/\sigma)_{\max}$                                                   | < 0.001                                                                            |
| $\Delta\rho_{\max}, \Delta\rho_{\min}$ (e Å <sup>-3</sup> )                | 0.17, -0.16                                                                        |

## References

1. Sheldrick GM (2008) Acta Cryst A64: 112
2. Farrugia LJ (1997) J Appl Cryst30:565
3. Farrugia LJ (1999) J Appl Cryst32:837
4. Nardelli M (1995) J Appl Cryst 28:659

5. Spek AL (2009) *Acta Cryst D* 65: 148–155
